# Supplementary material for: Simulation Predicts IGFBP2-HIF1α Interaction Drives Glioblastoma Growth
Source: PubMed Central journal article supplement (PMC4401766; doi:10.1371/journal.pcbi.1004169), 2015-04-17

**S2 File: Sensitivity analysis supplement**  
**Sensitivity: initial conditions**

**IGFI**

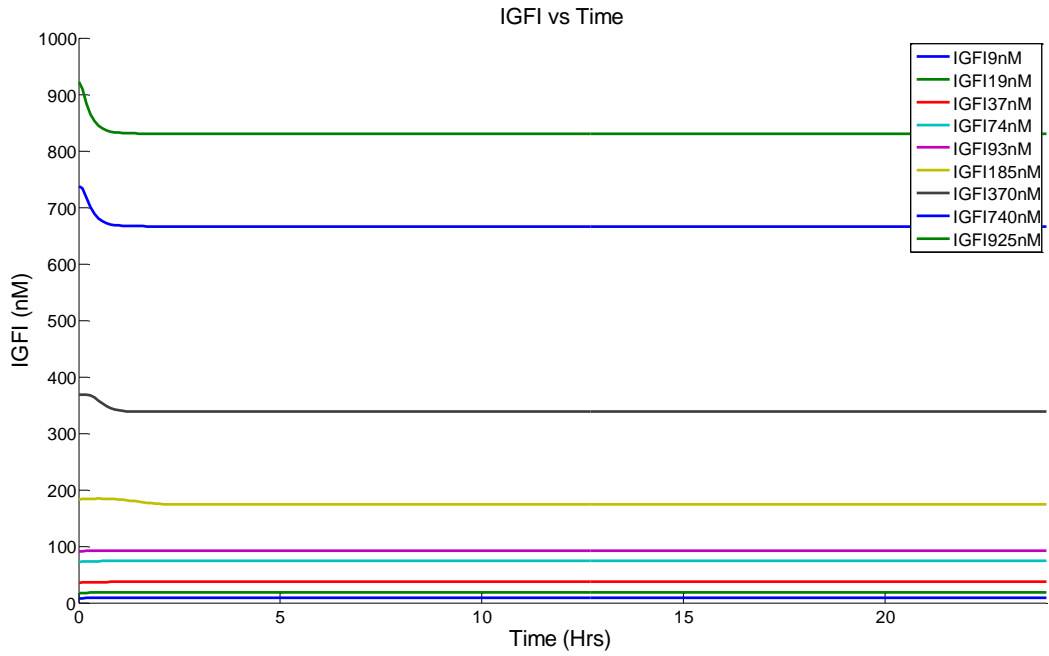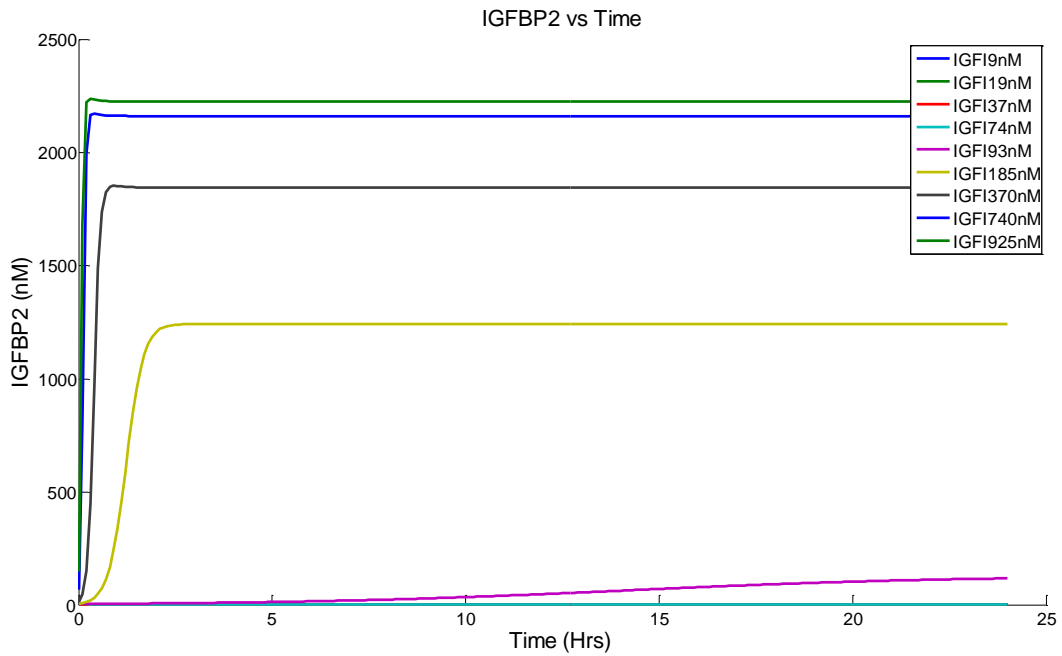

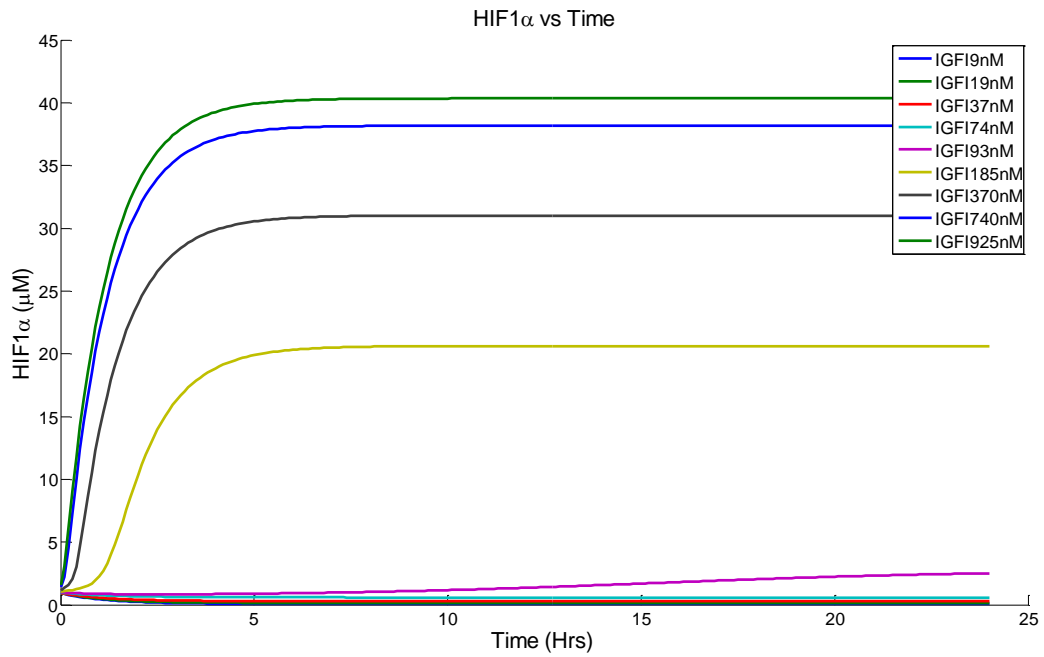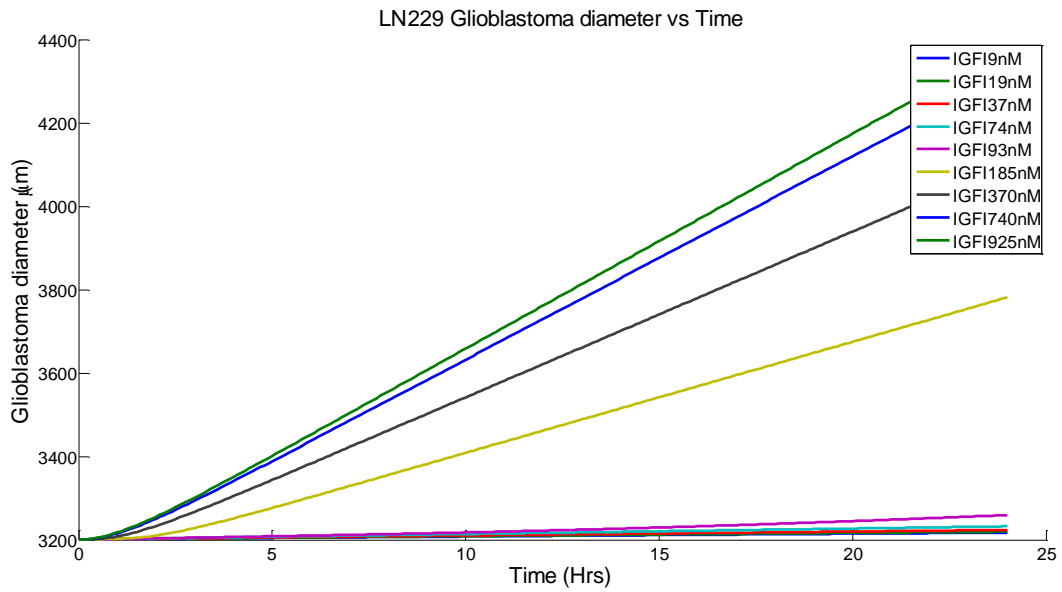



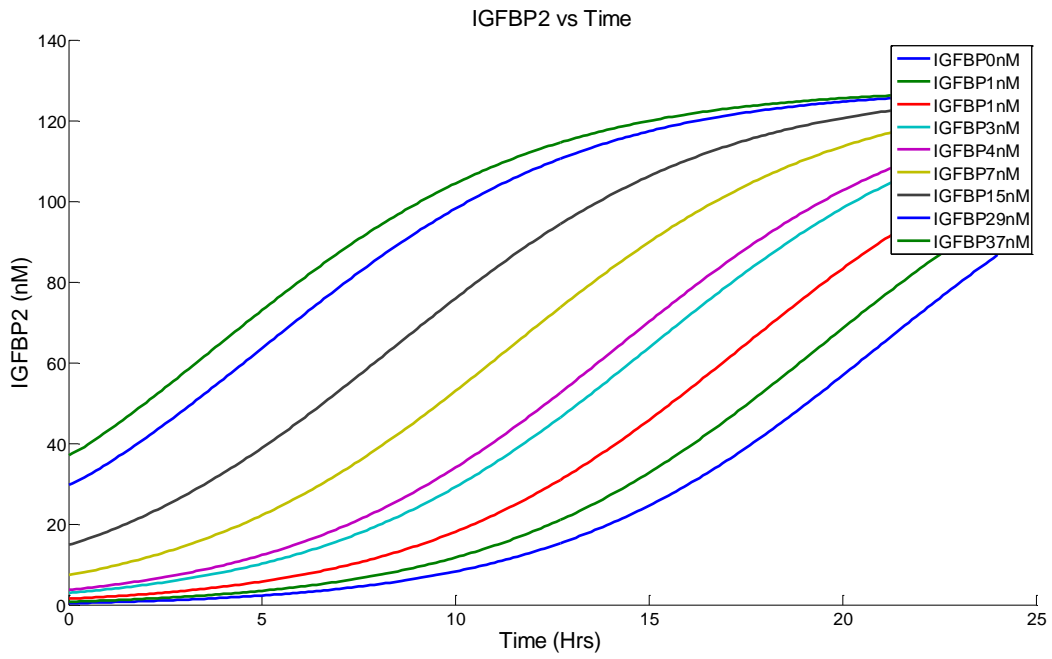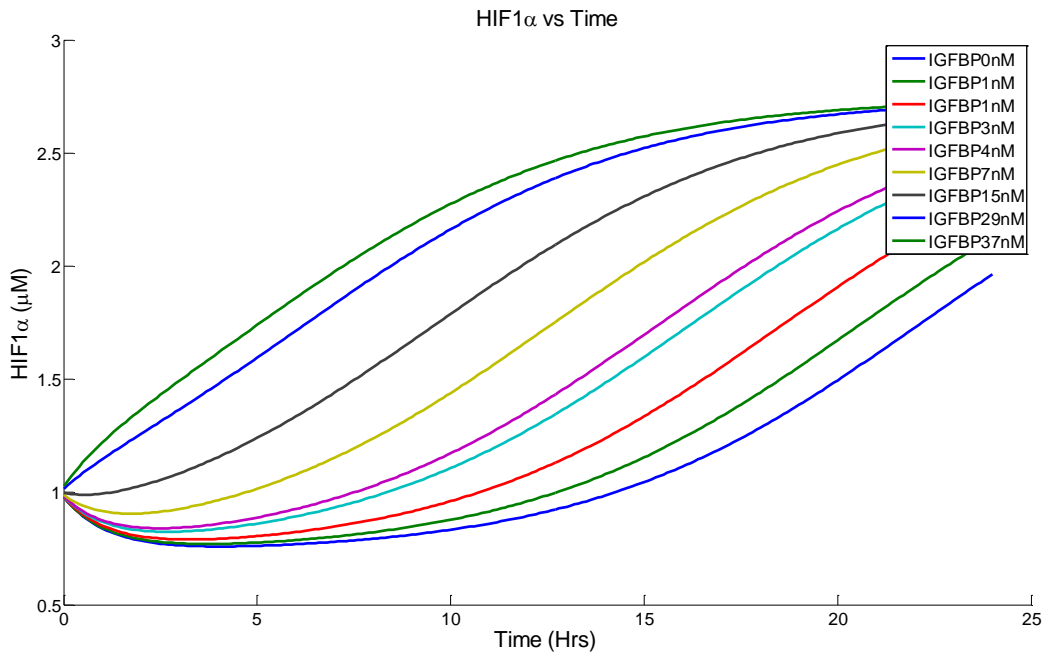

LN229 Glioblastoma diameter vs Time

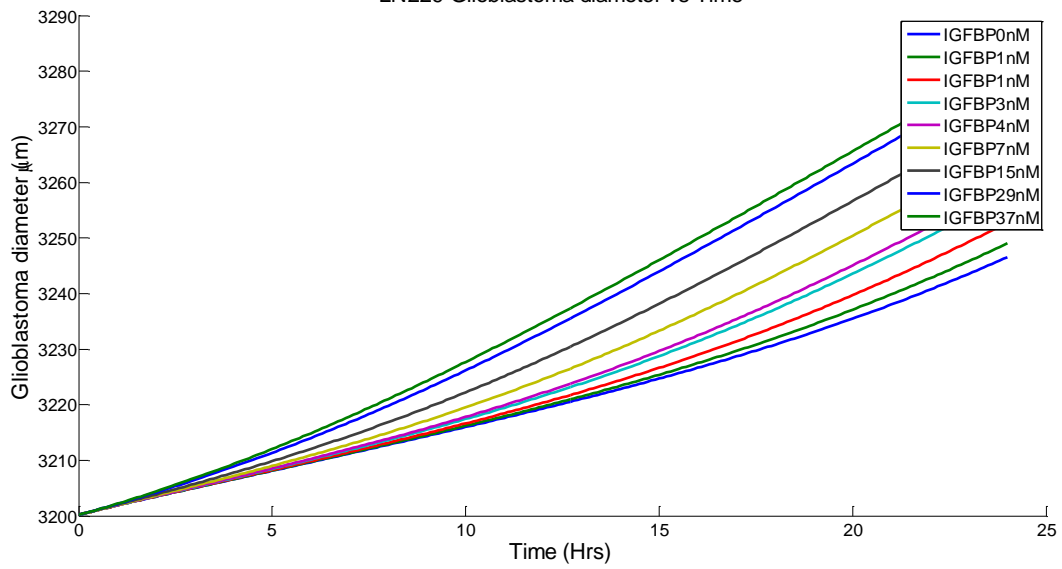

U87 Glioblastoma diameter vs Time

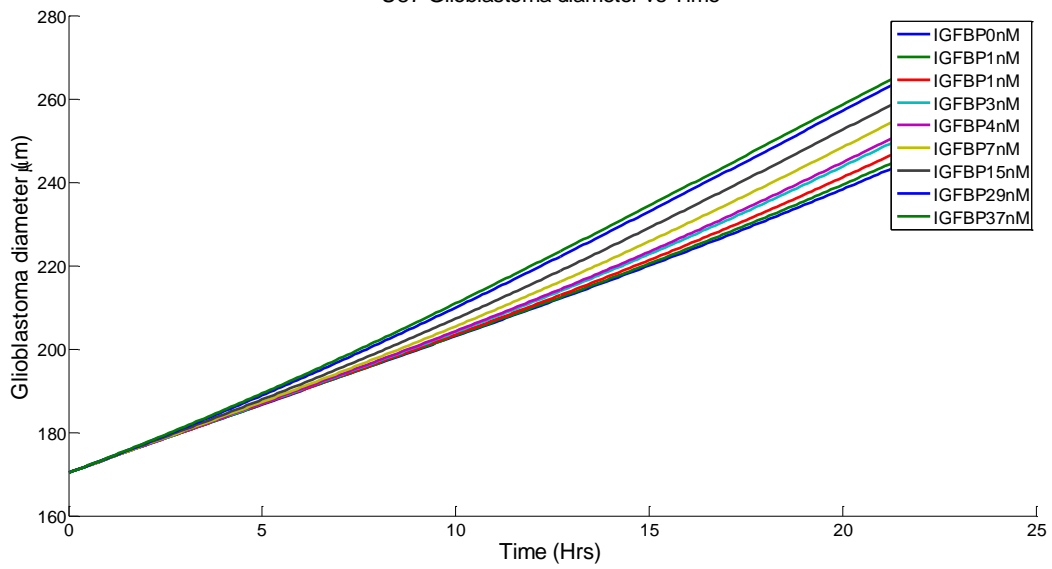

# IGFI-IGFBP2<sub>complex</sub>

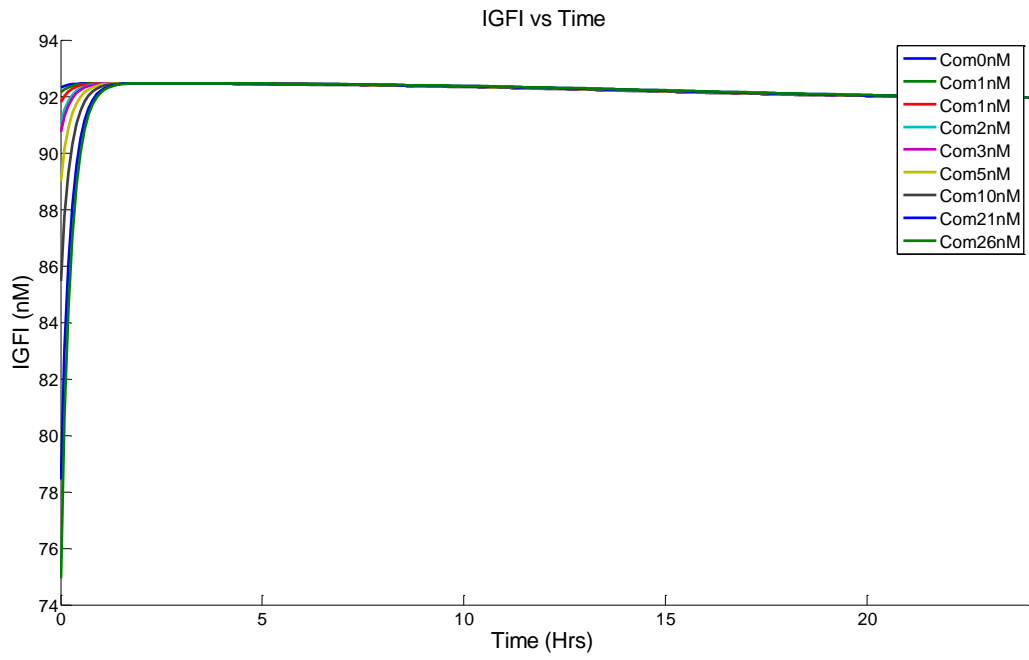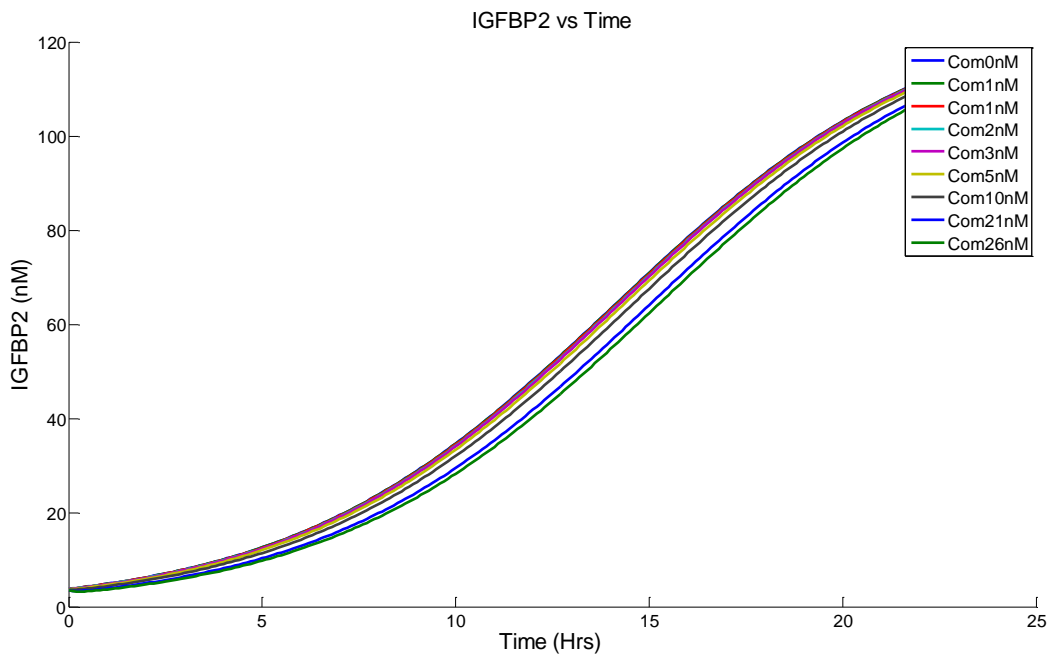



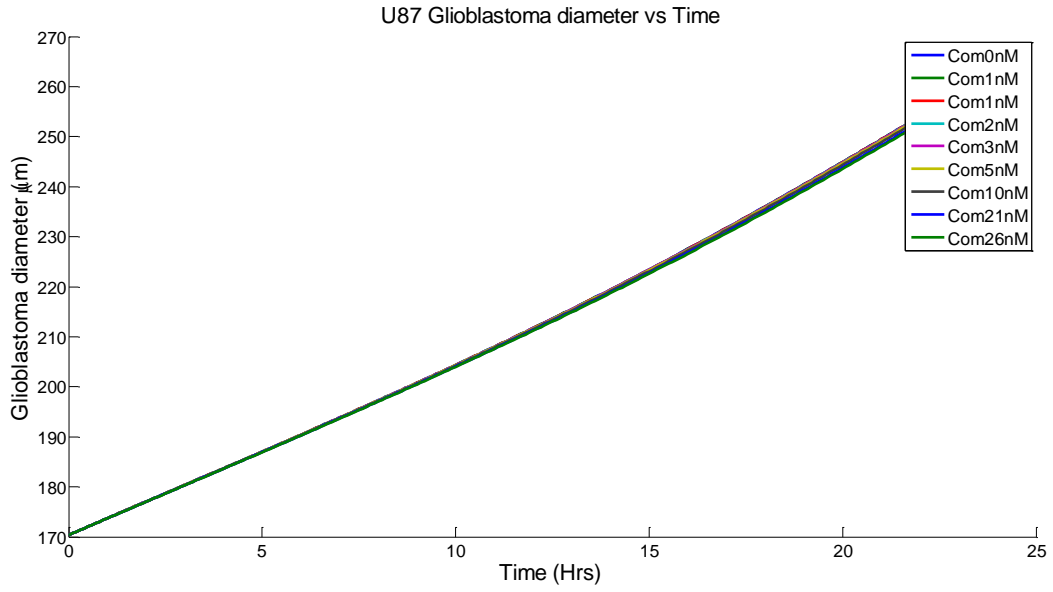

## Oxygen

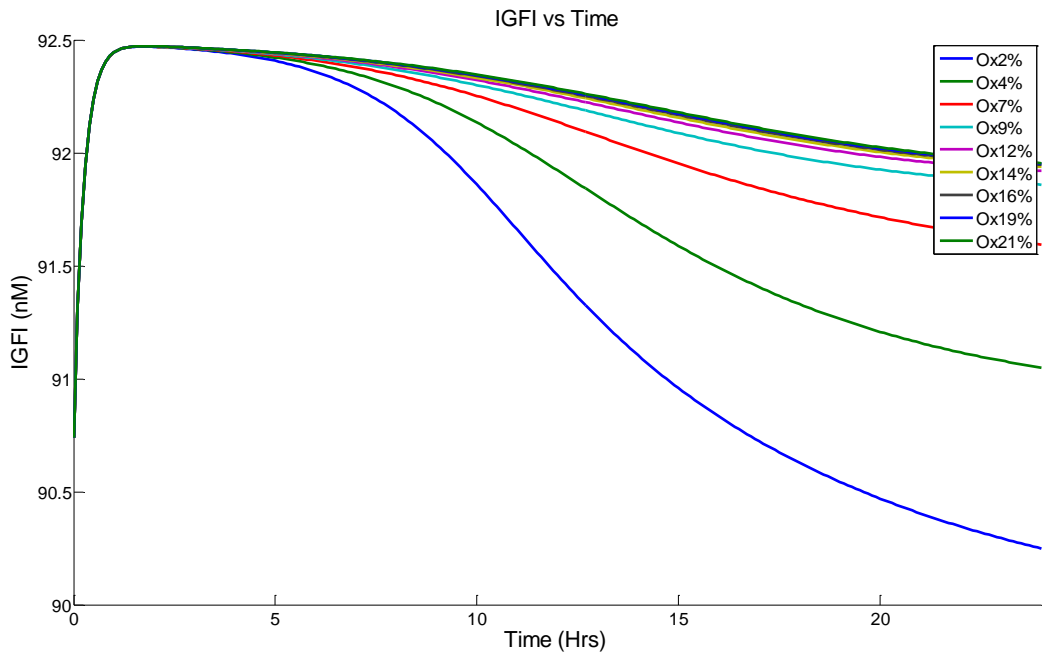



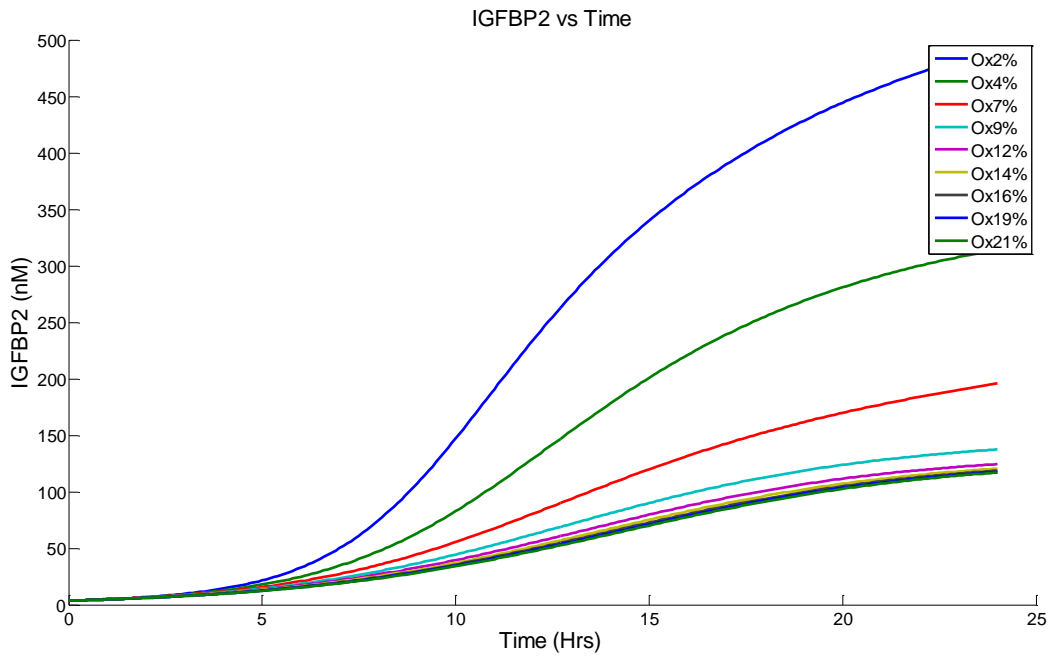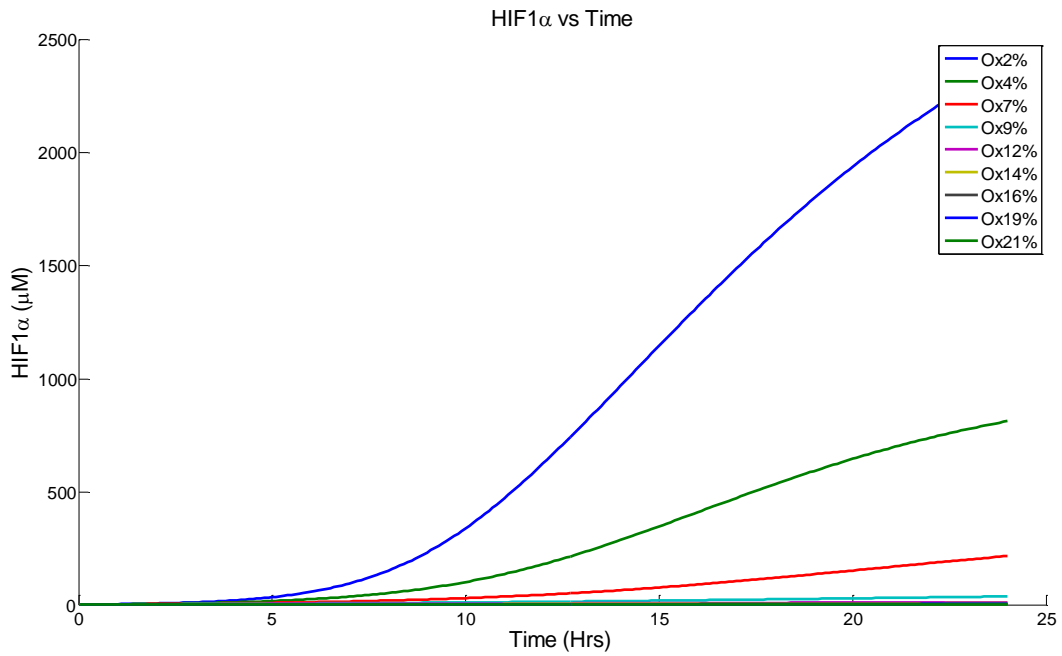



# HIF1 $\alpha$

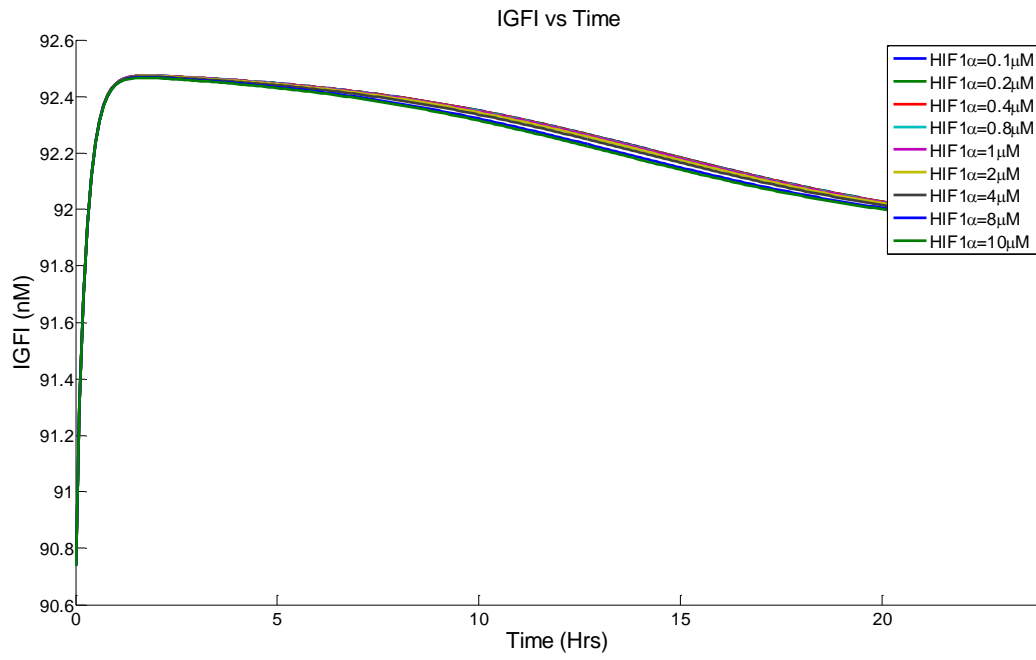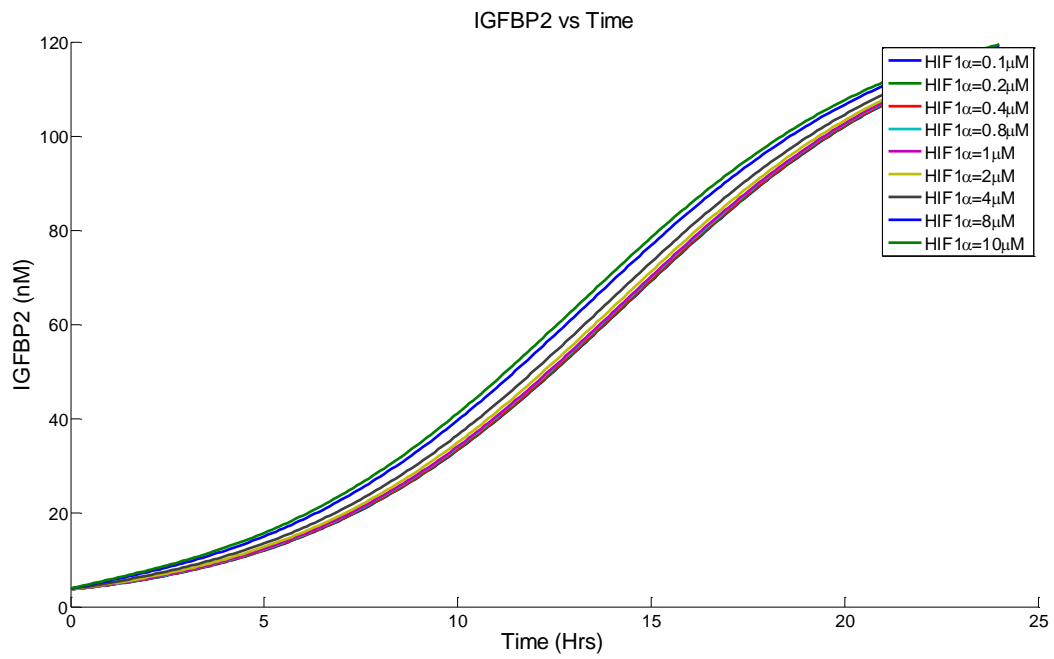

HIF1 $\alpha$  vs Time

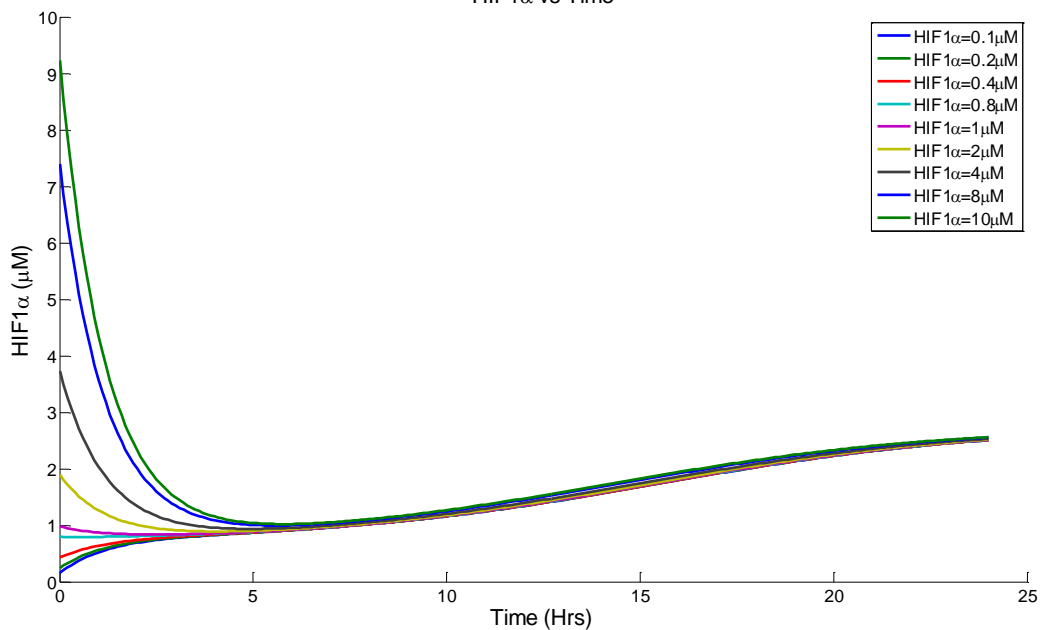

LN229 Glioblastoma diameter vs Time

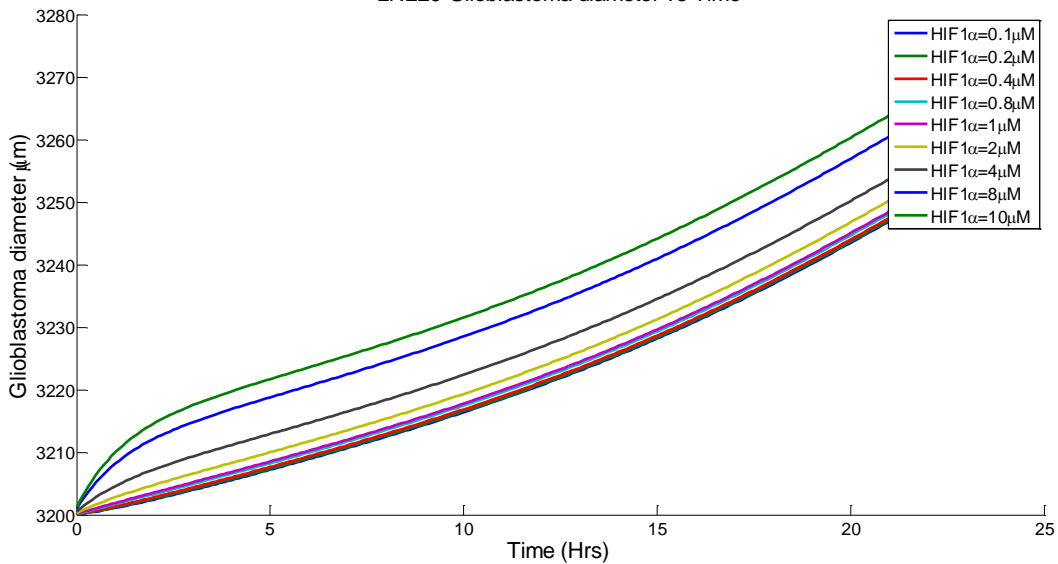

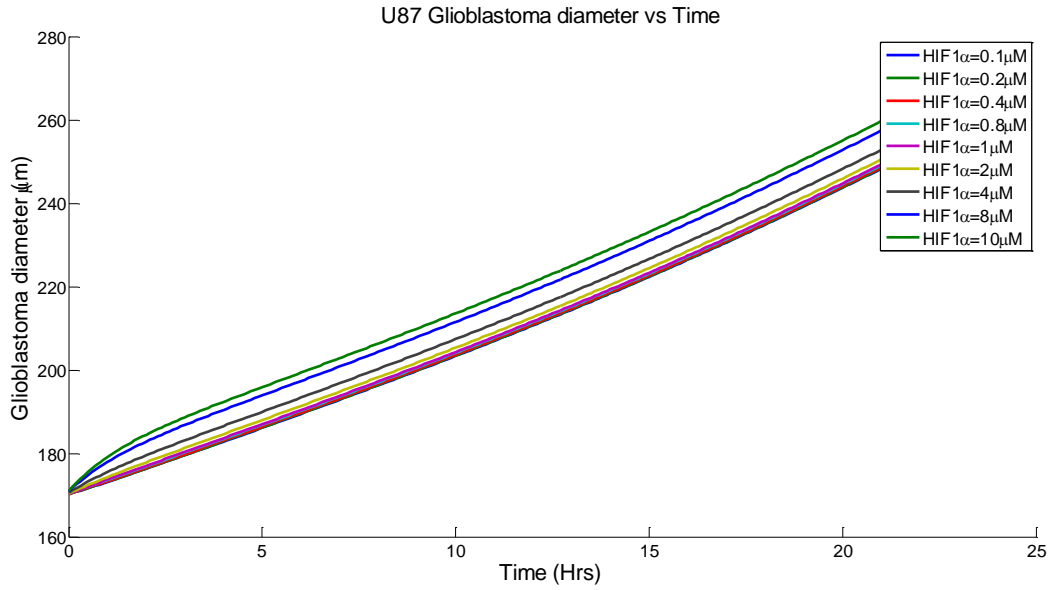

### Sensitivity analysis: rate constants

**k1**

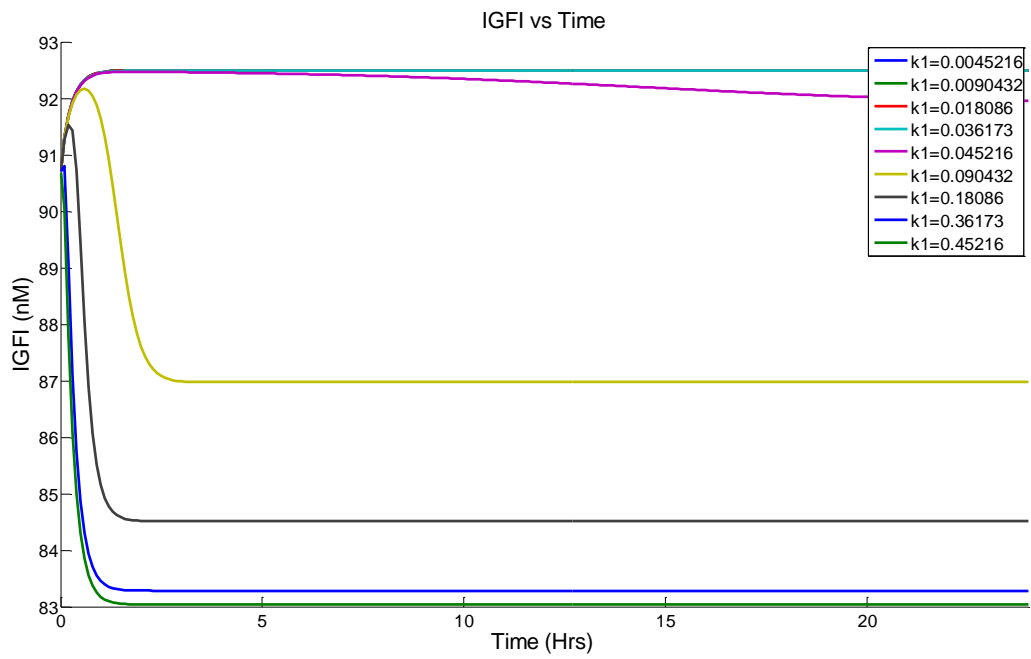

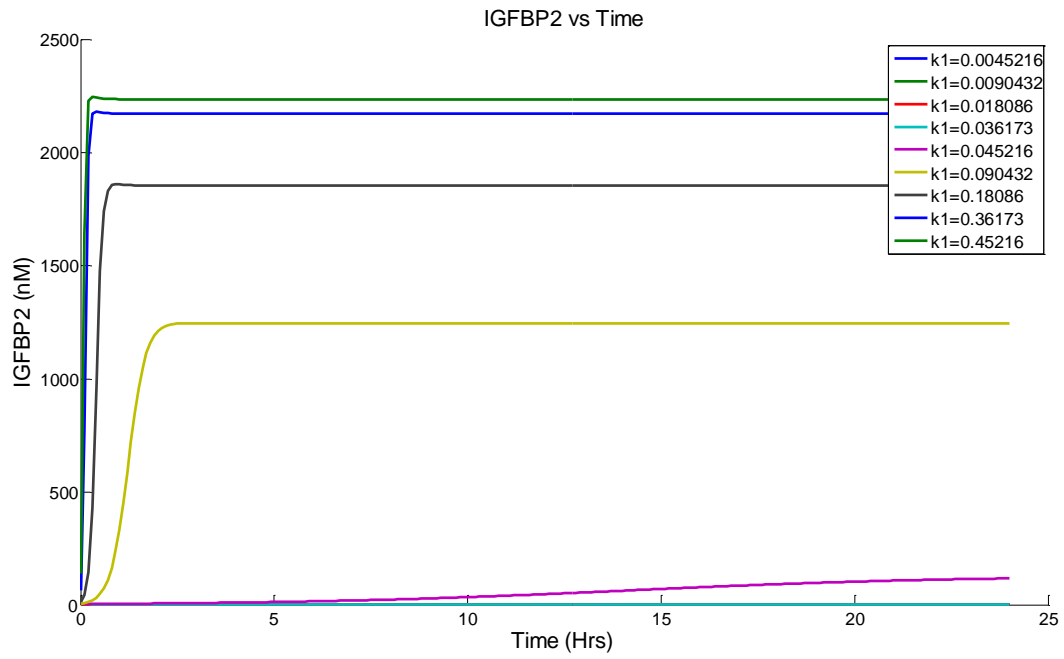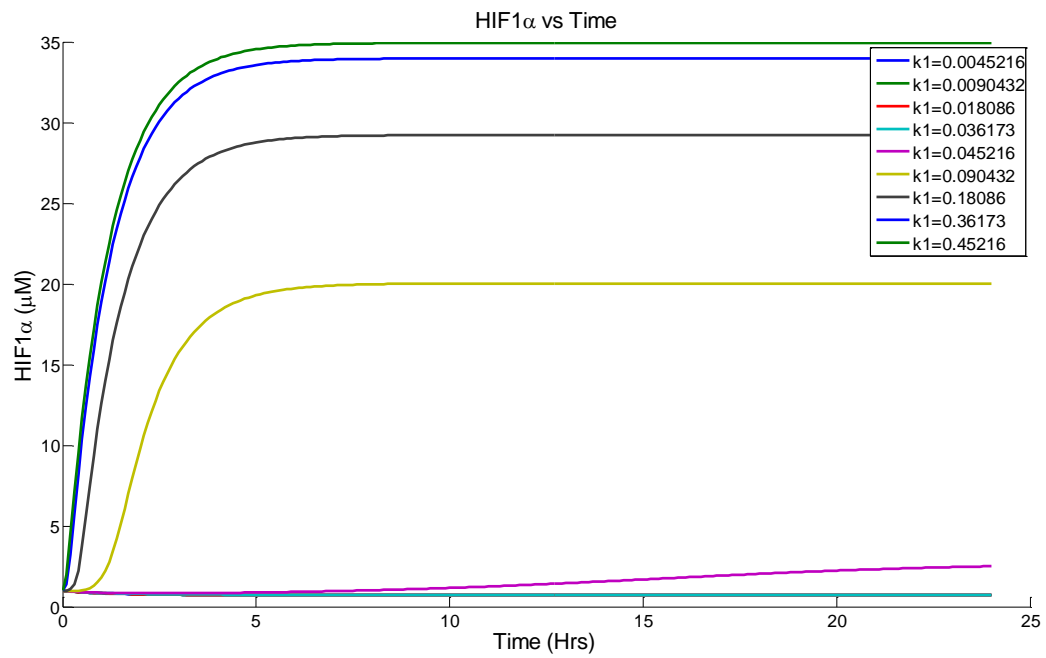

LN229 Glioblastoma diameter vs Time

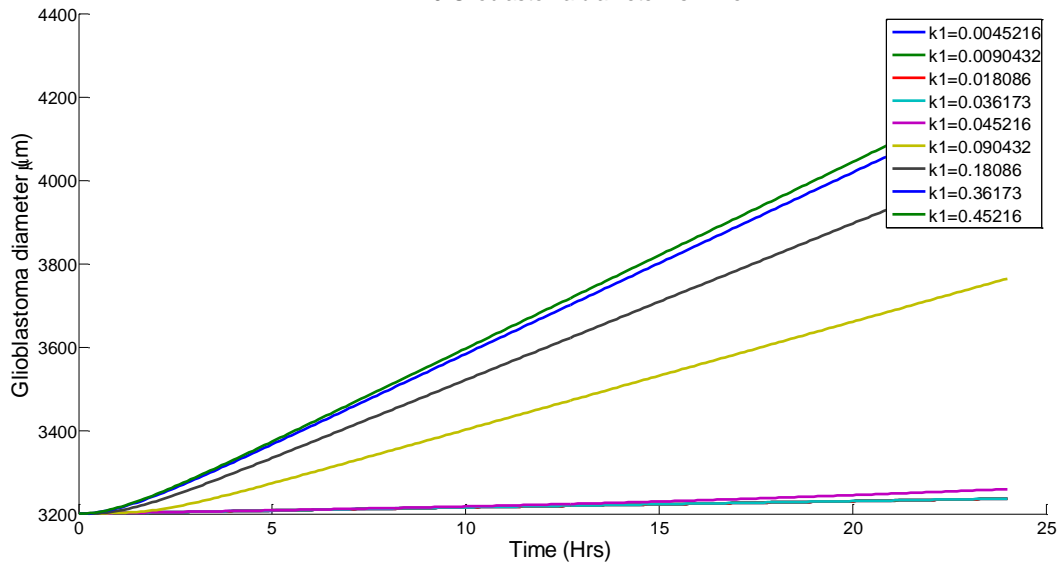

U87 Glioblastoma diameter vs Time

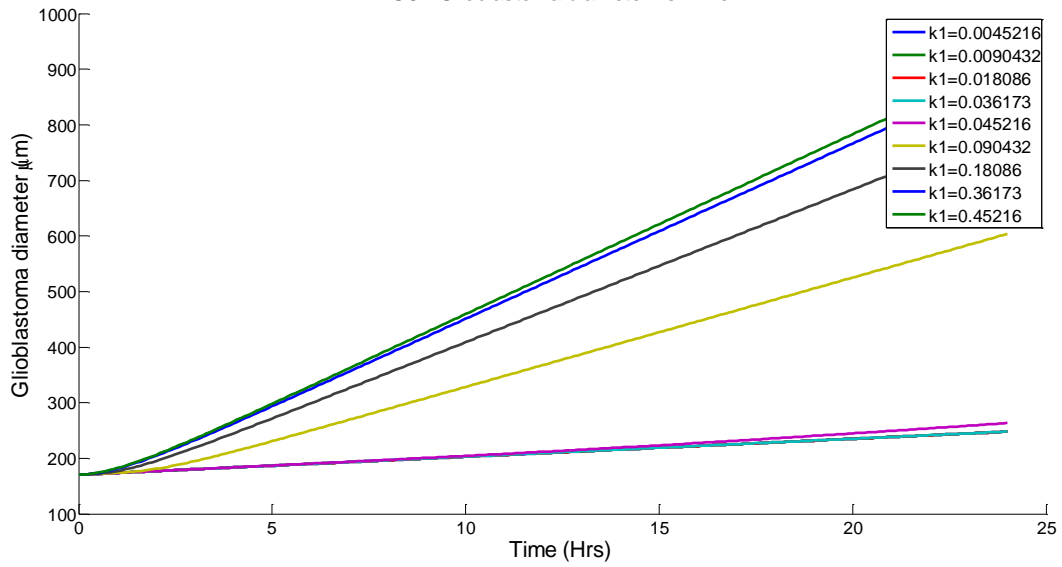

k2

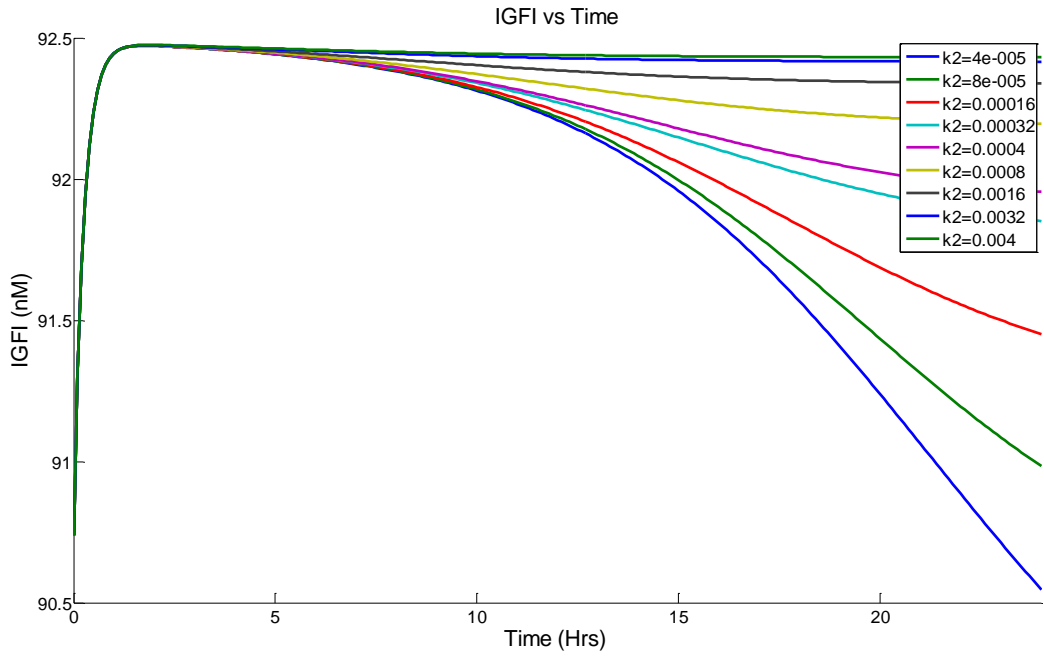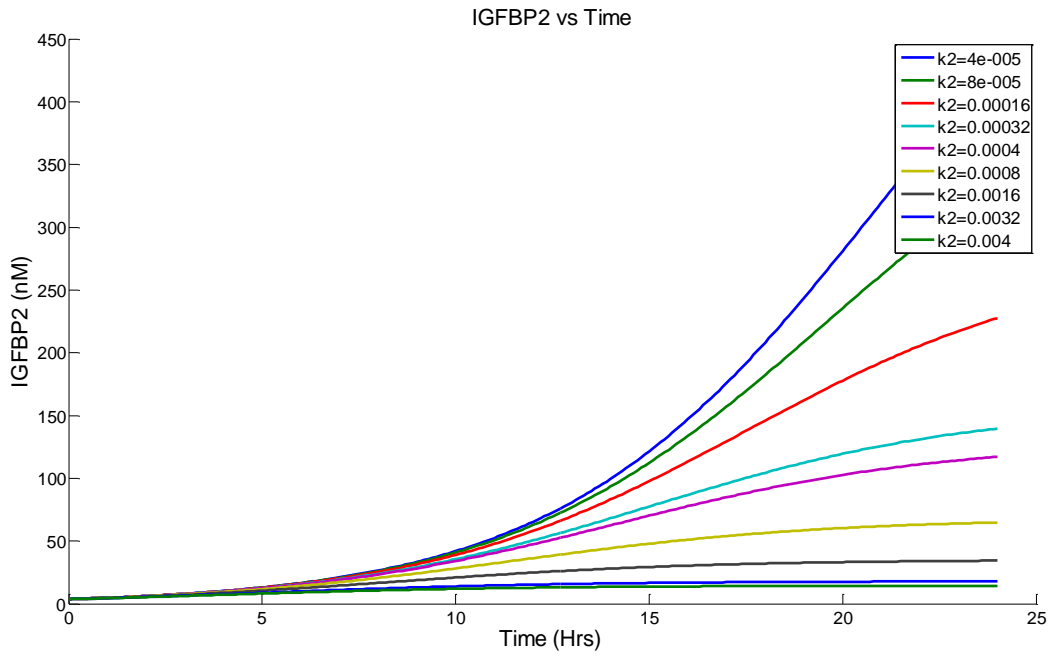







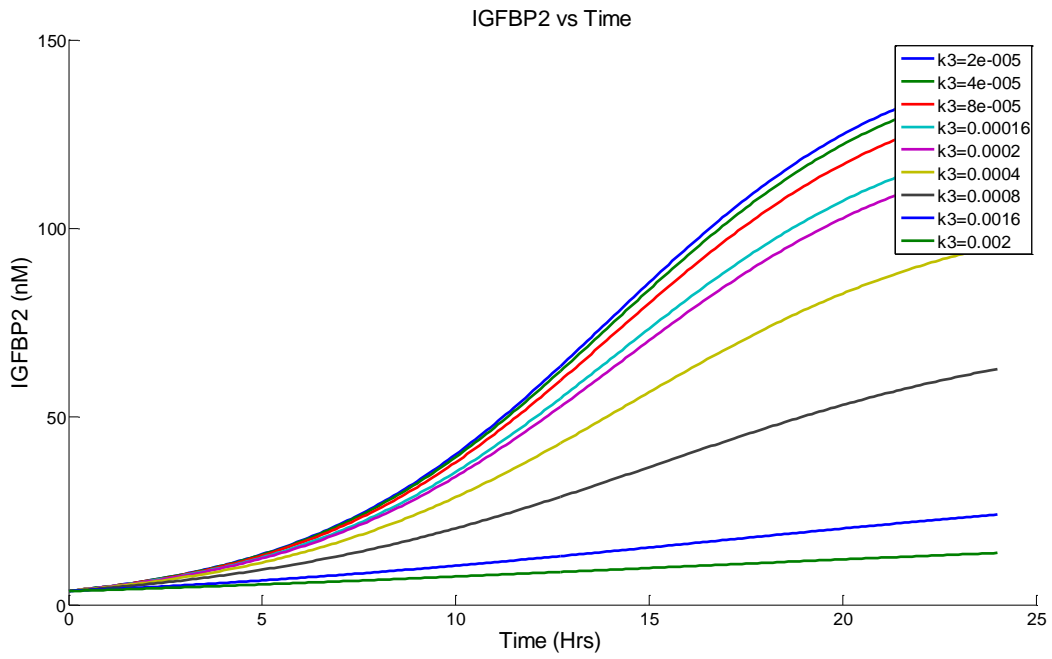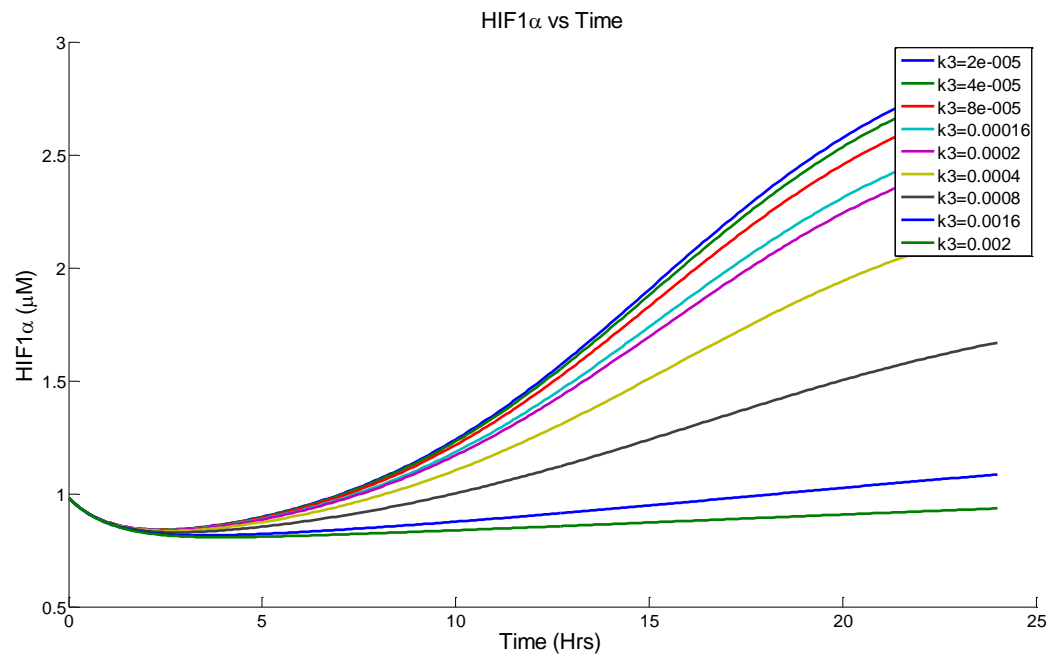



k4

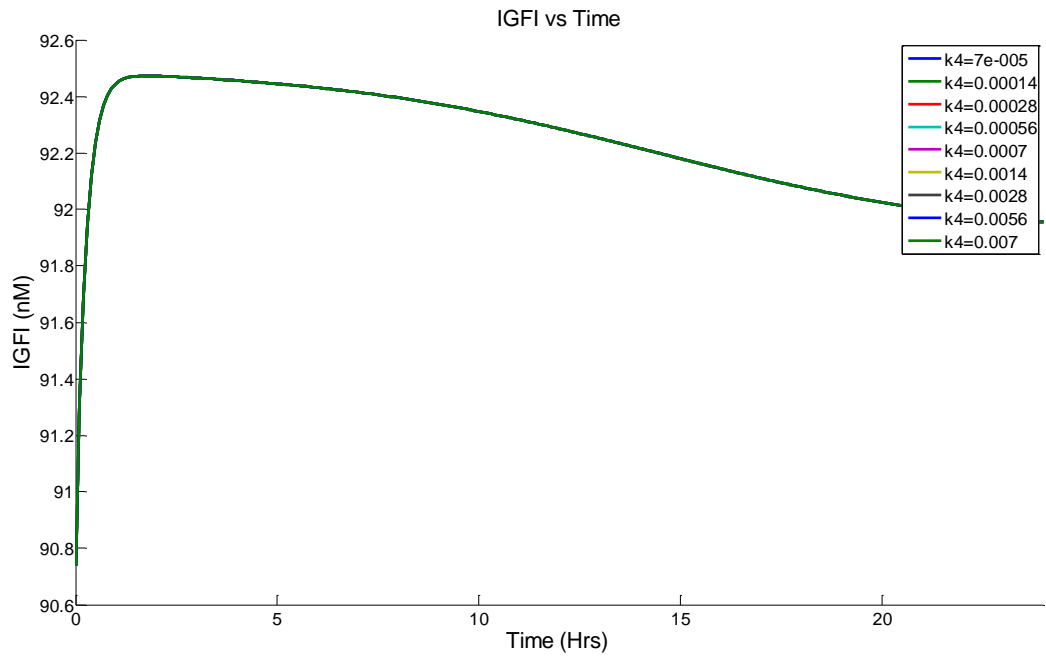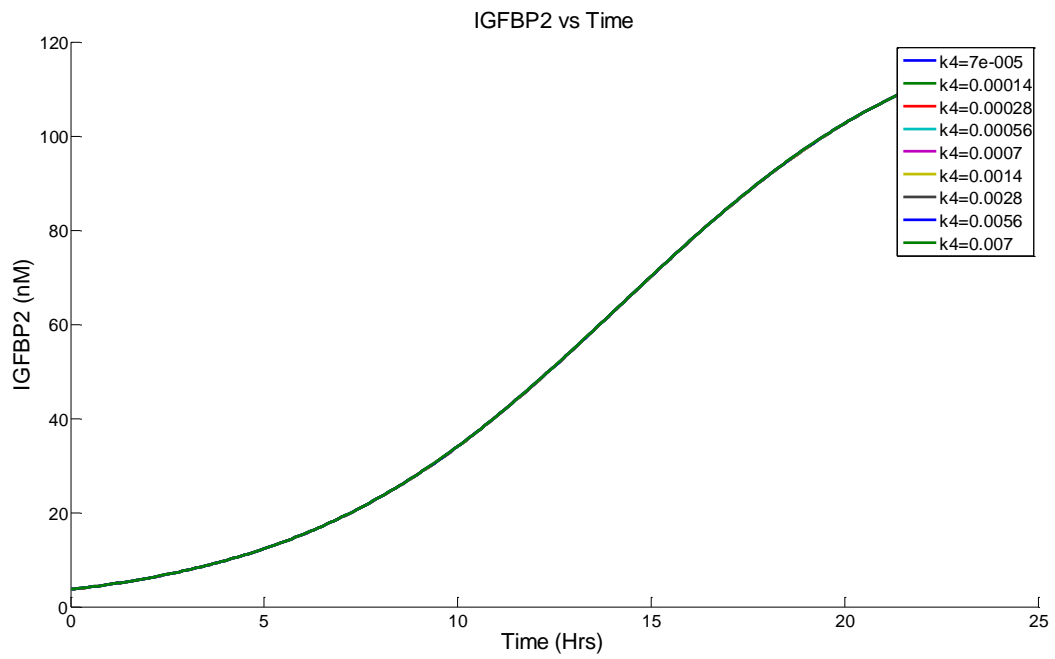

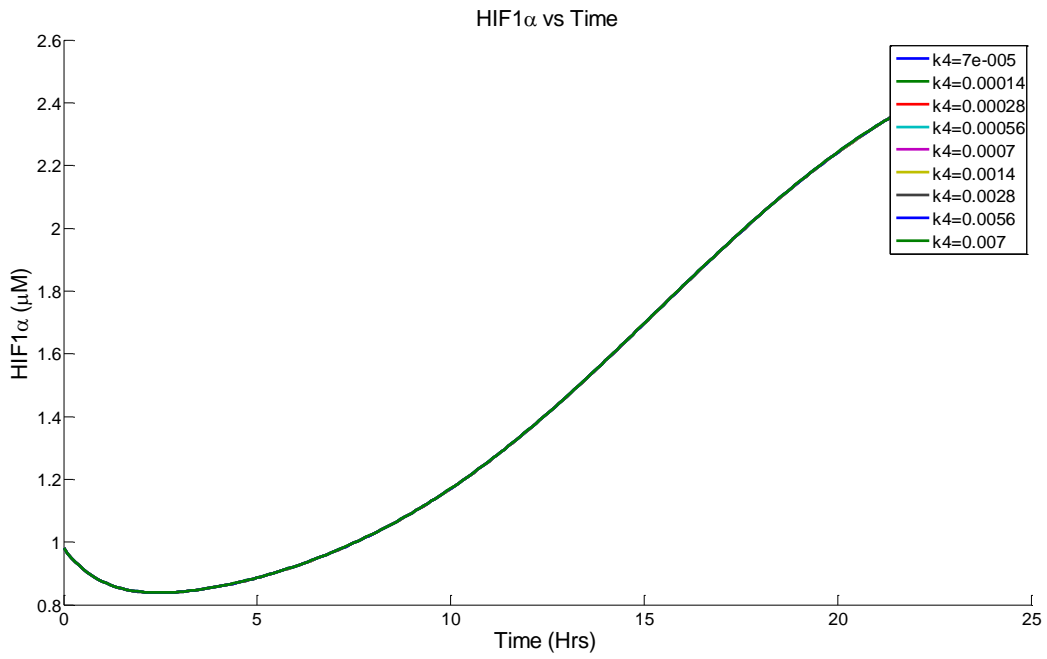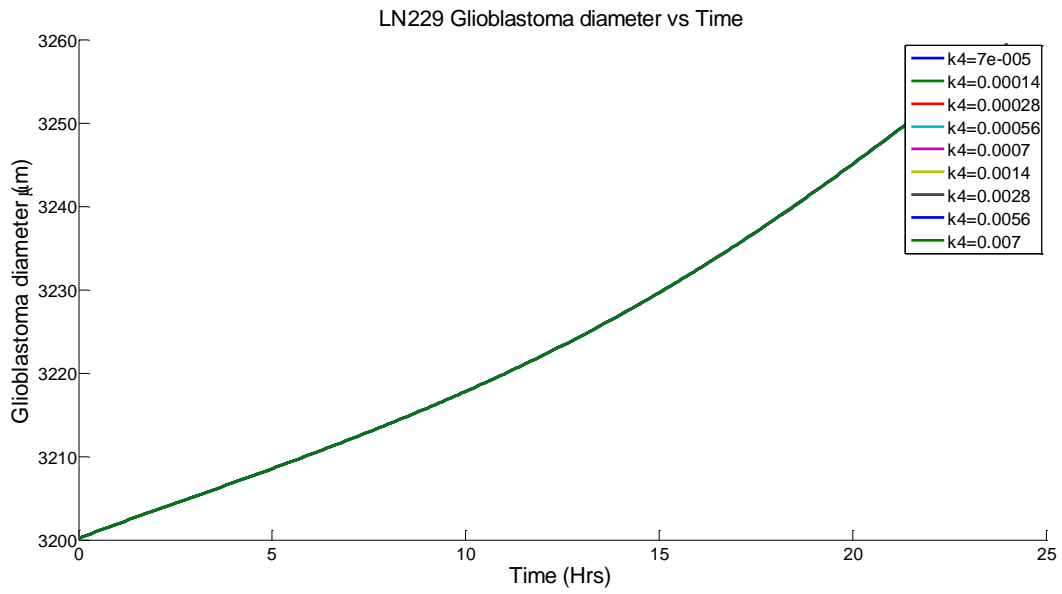

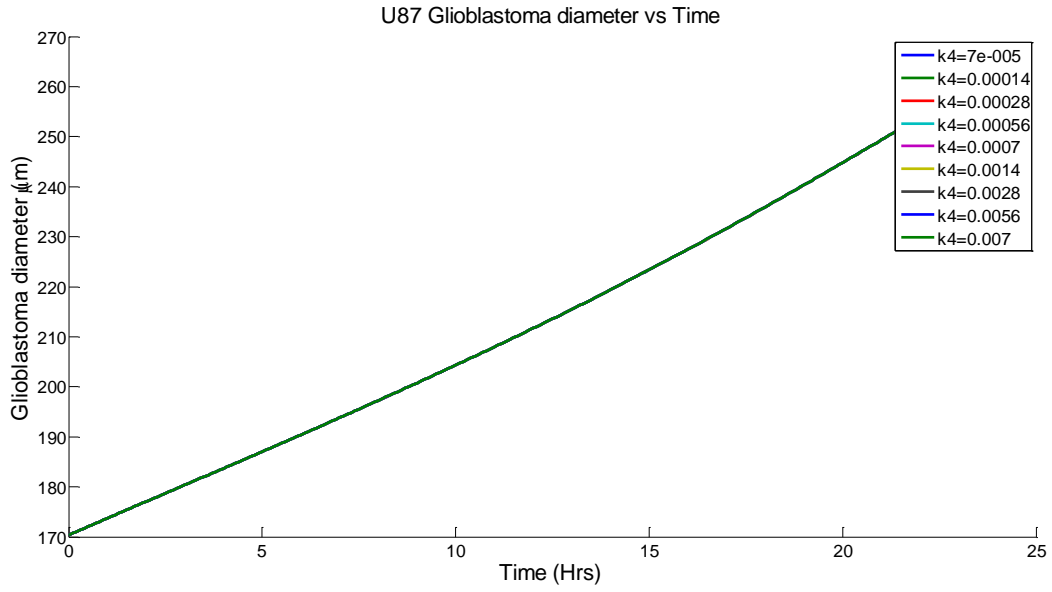

**k5**

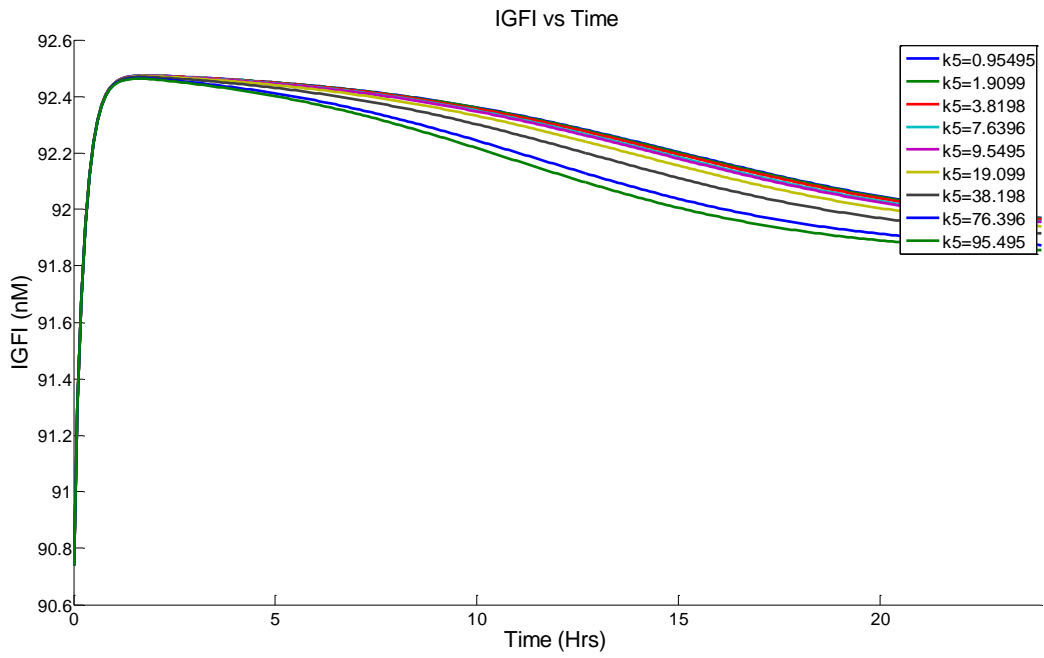

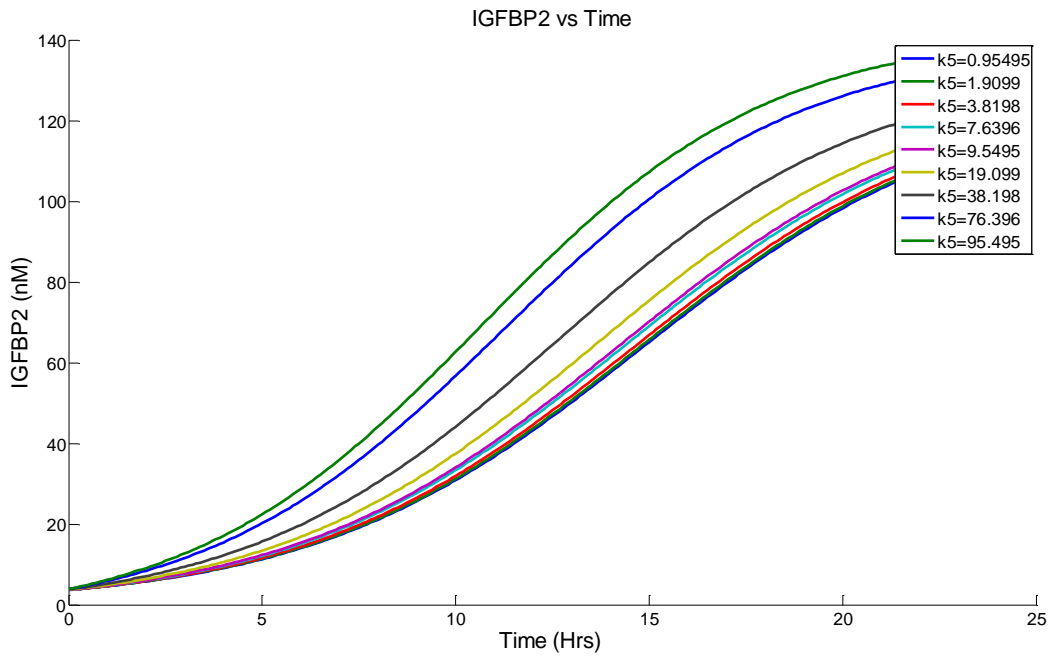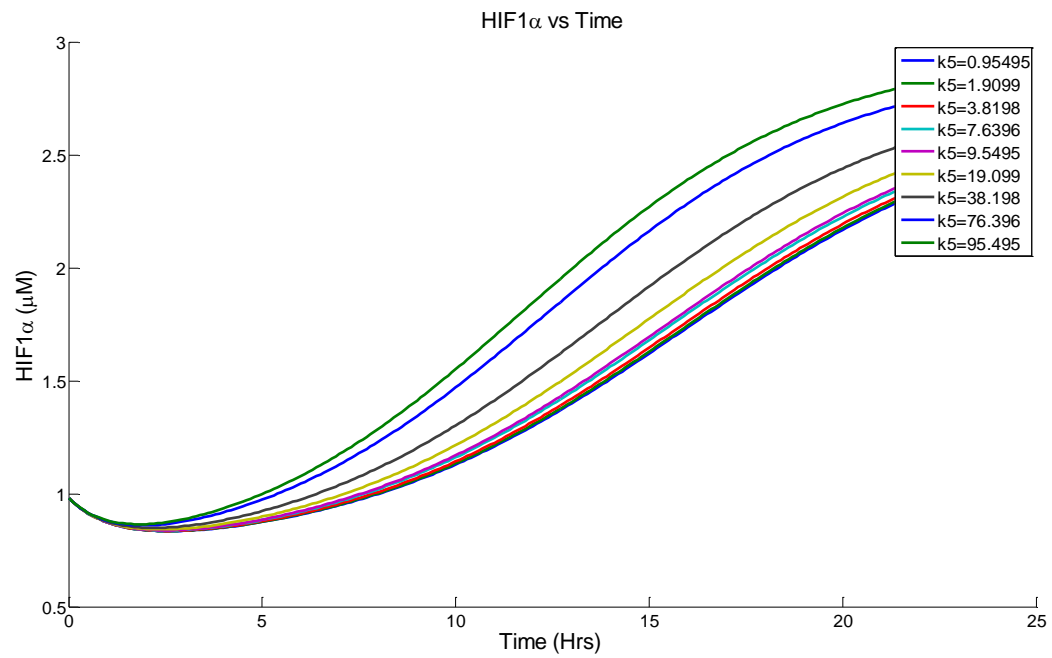





kd

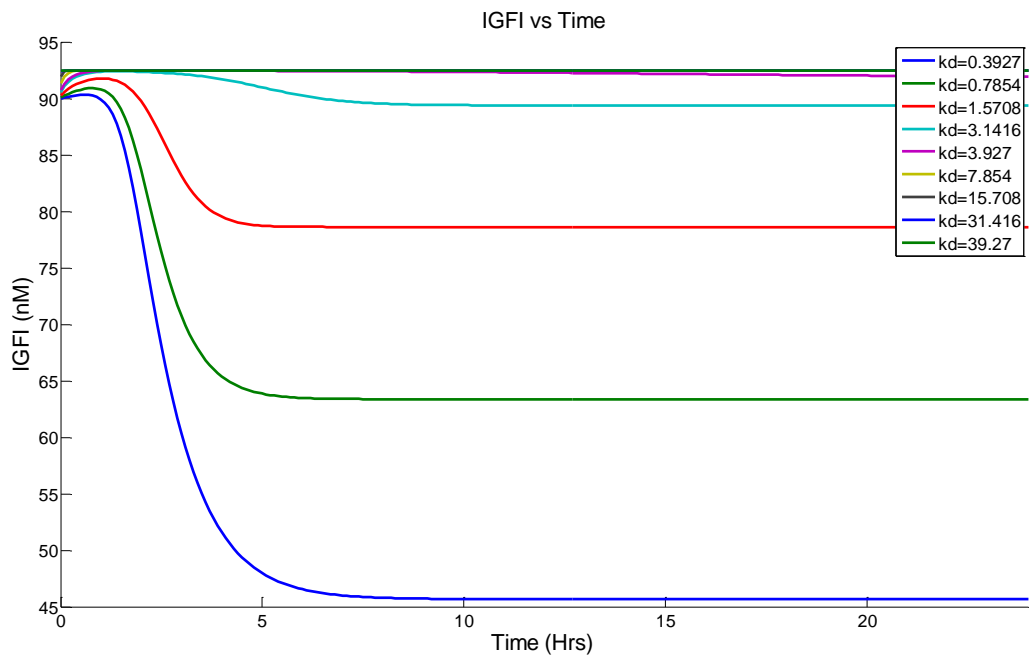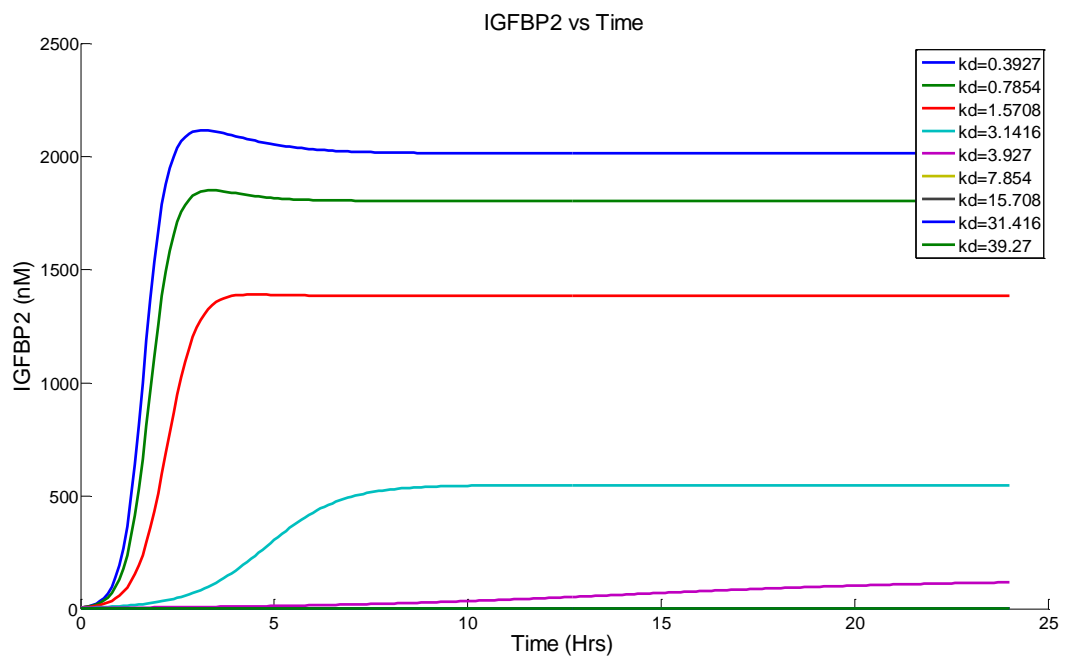

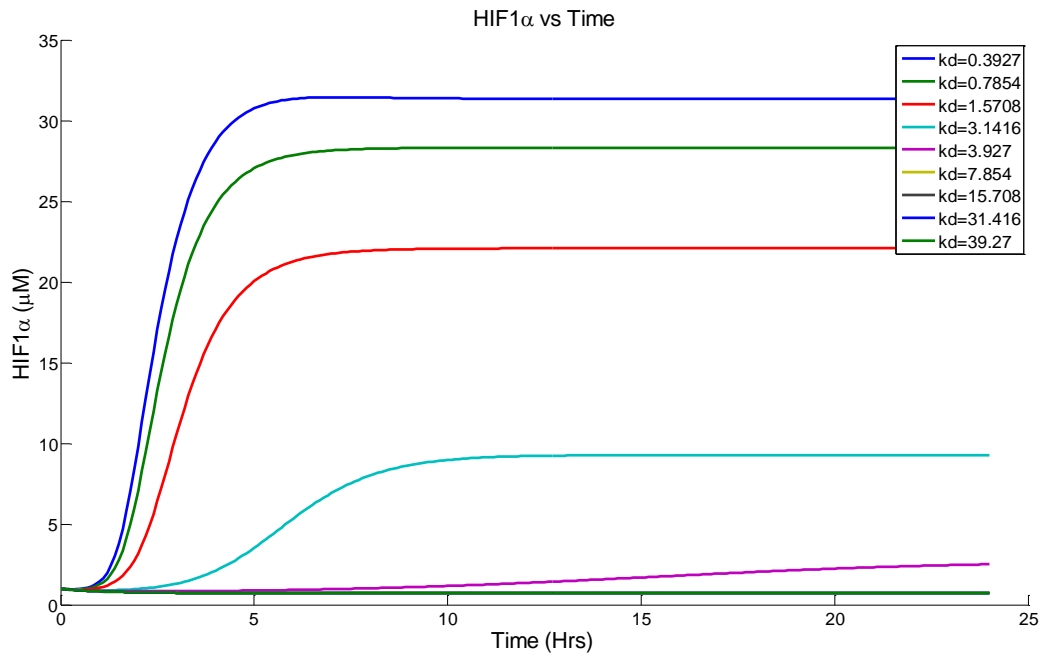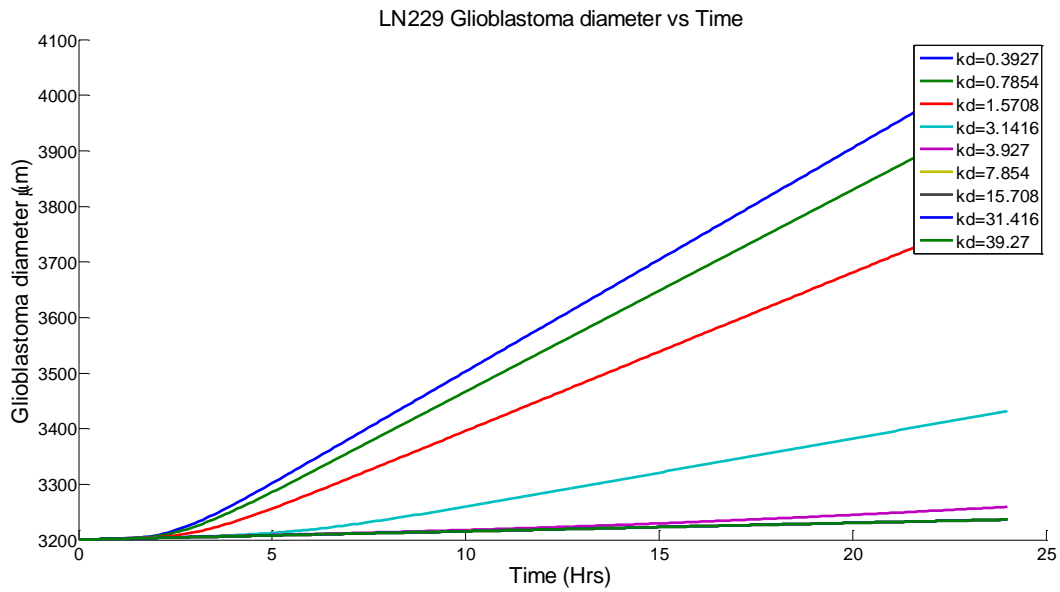



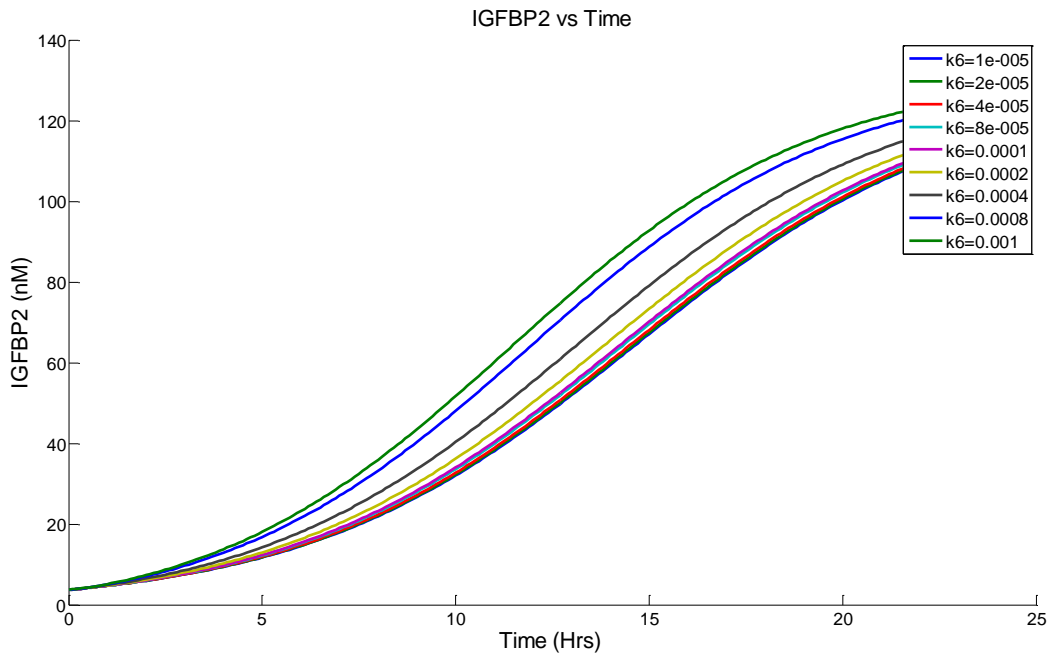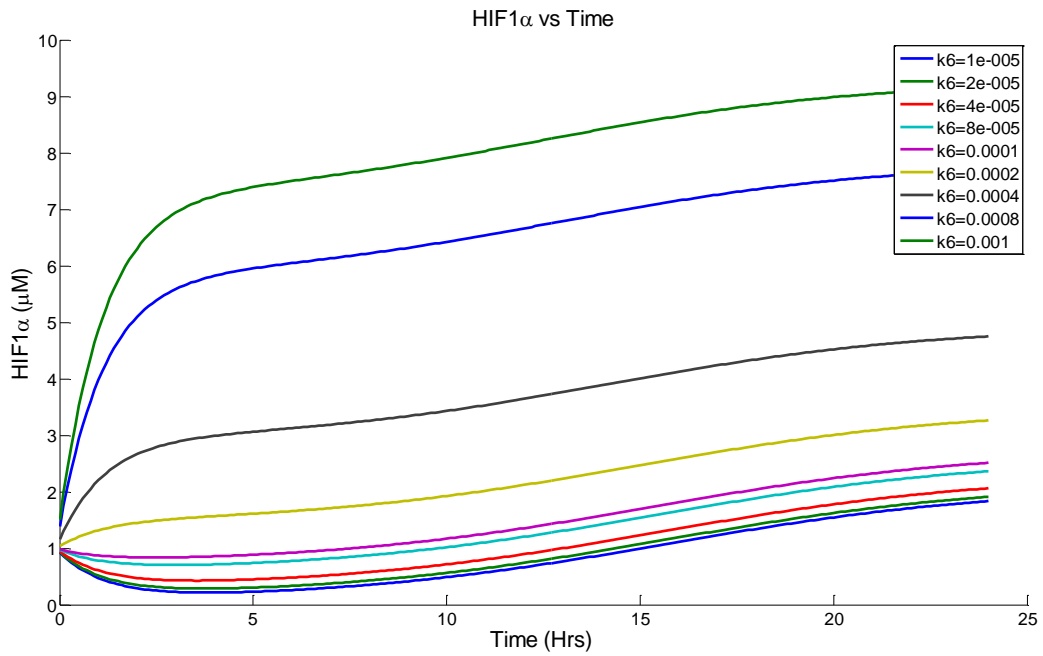

LN229 Glioblastoma diameter vs Time

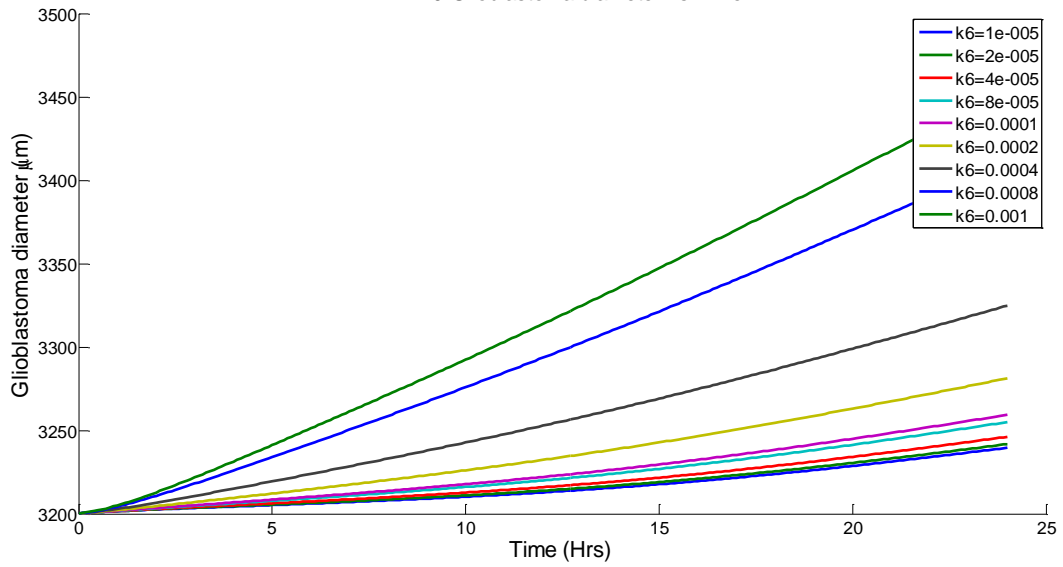

U87 Glioblastoma diameter vs Time

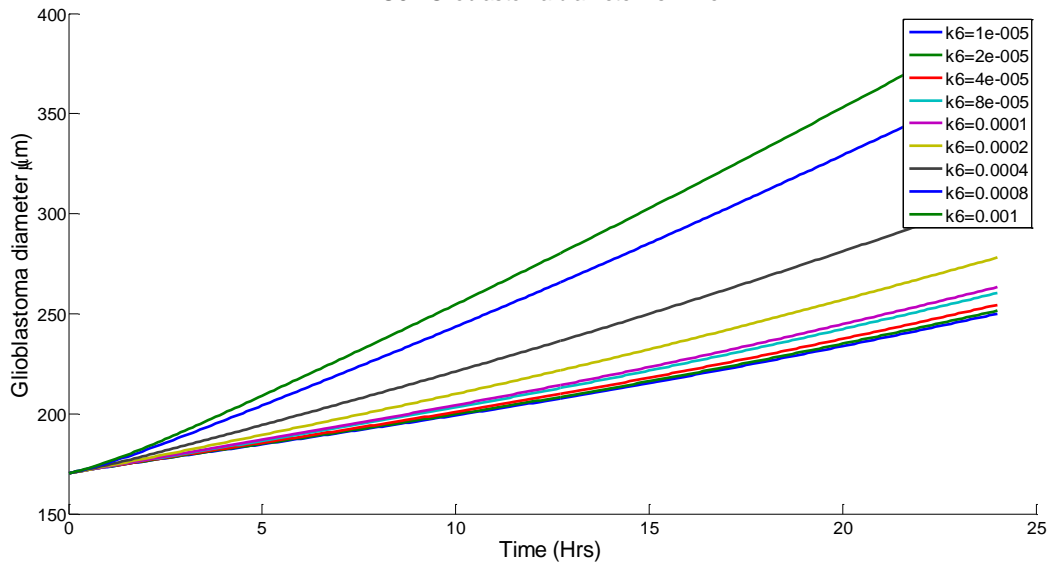

k7

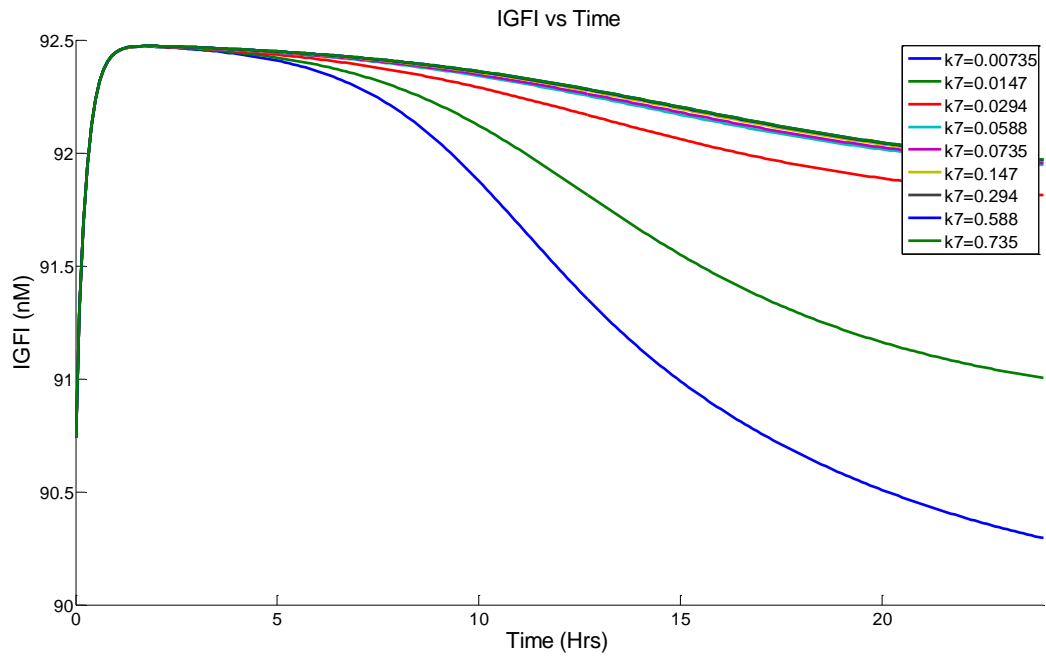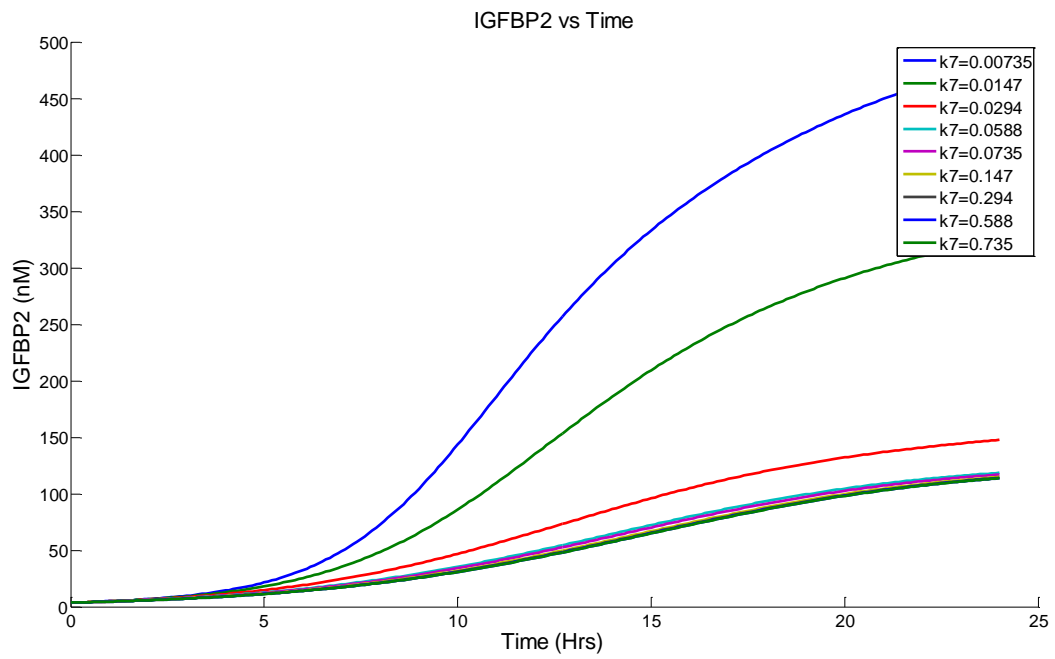







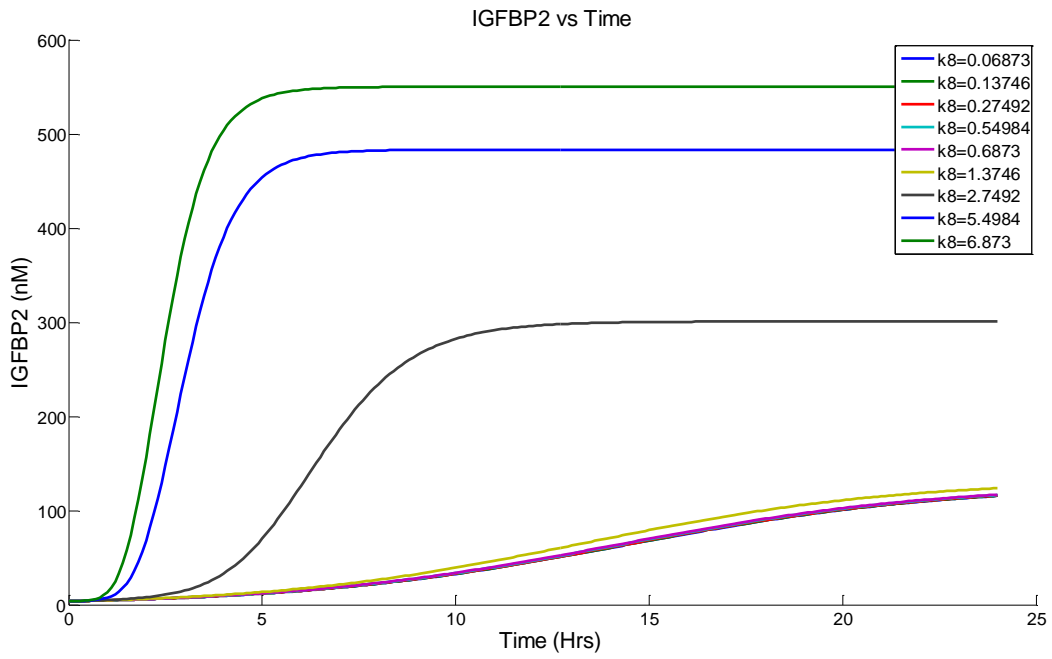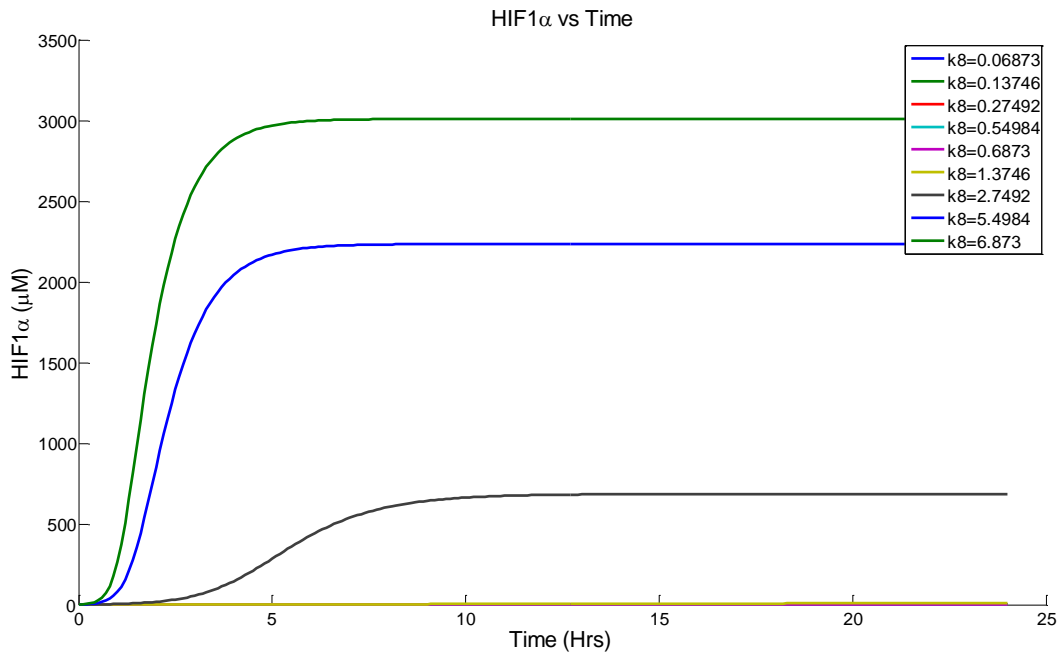

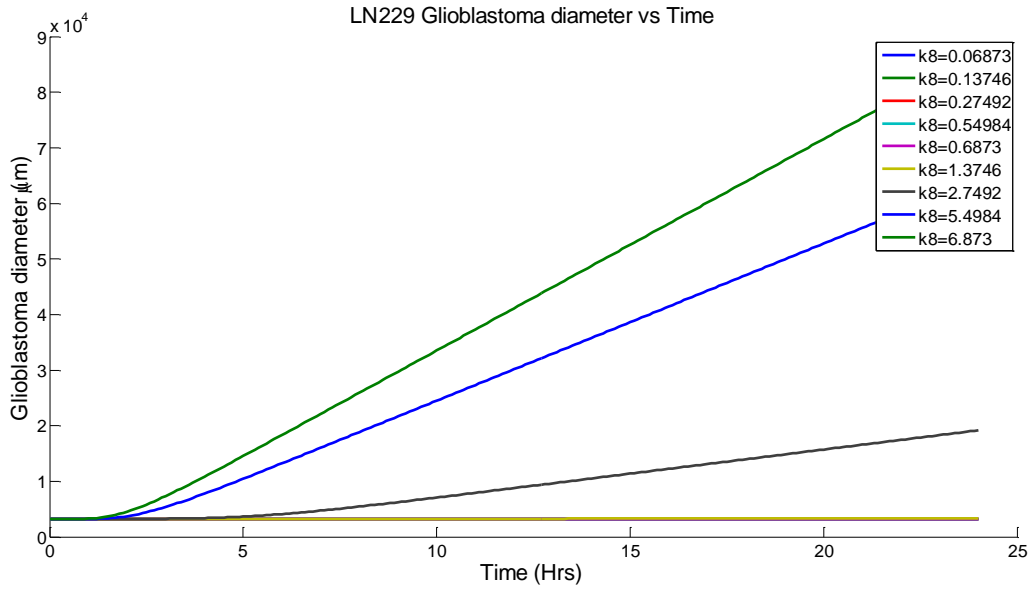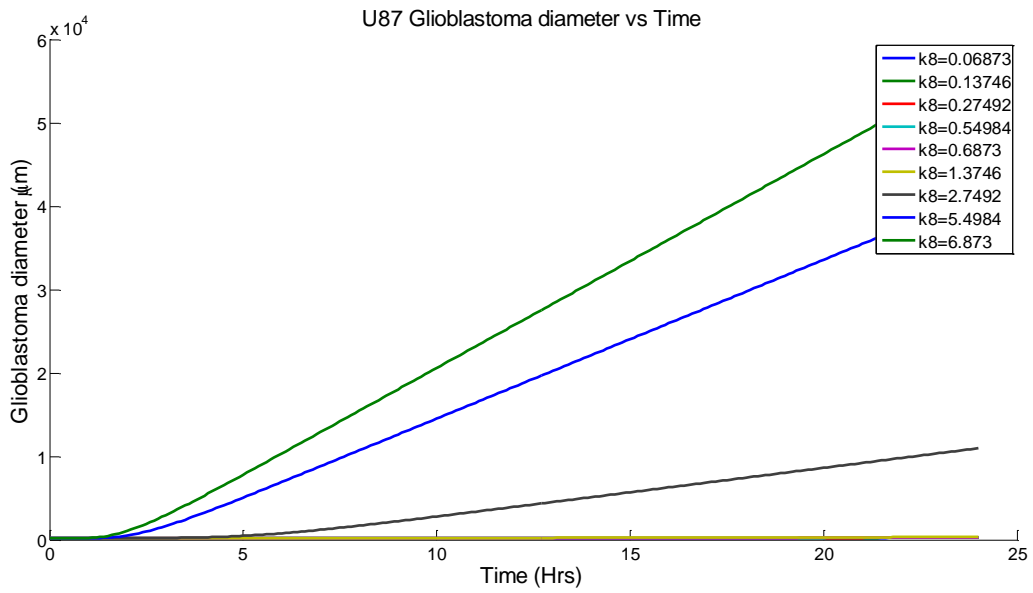

**k9**

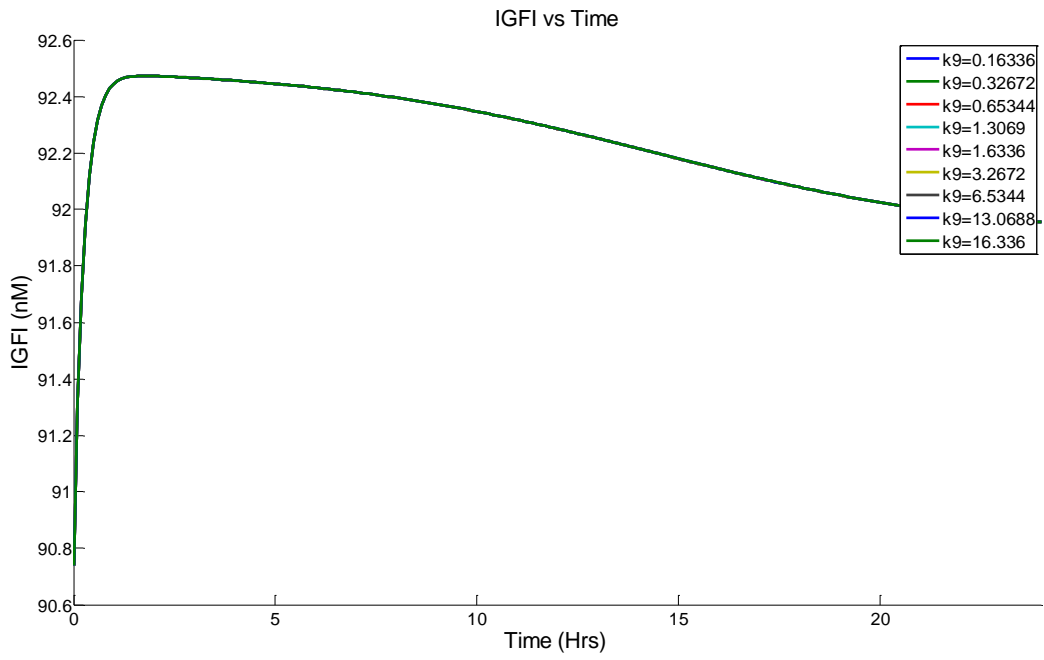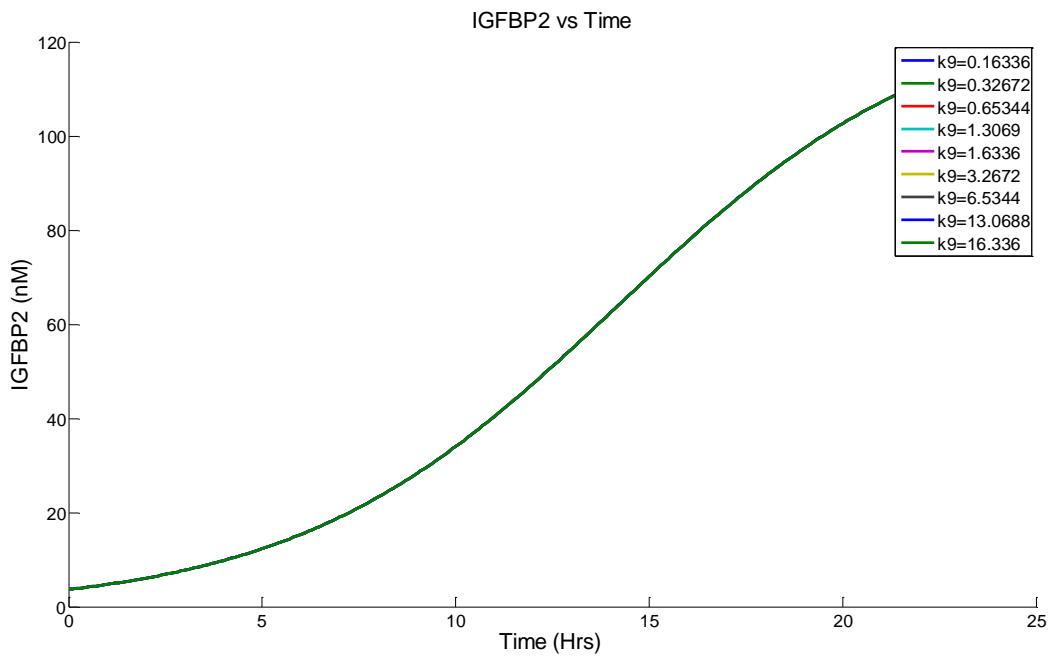

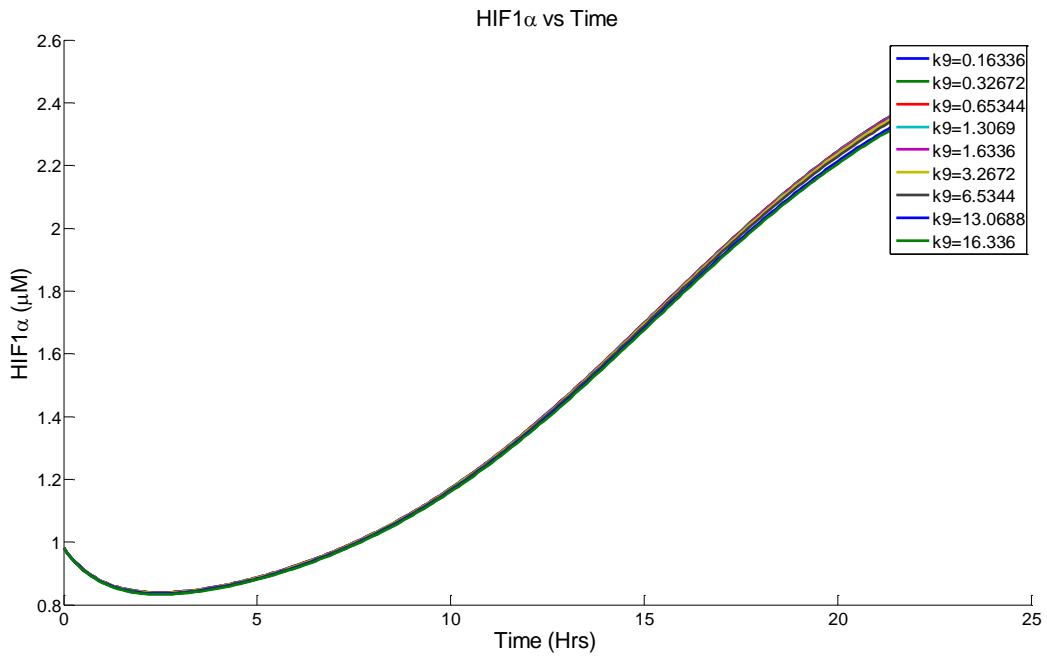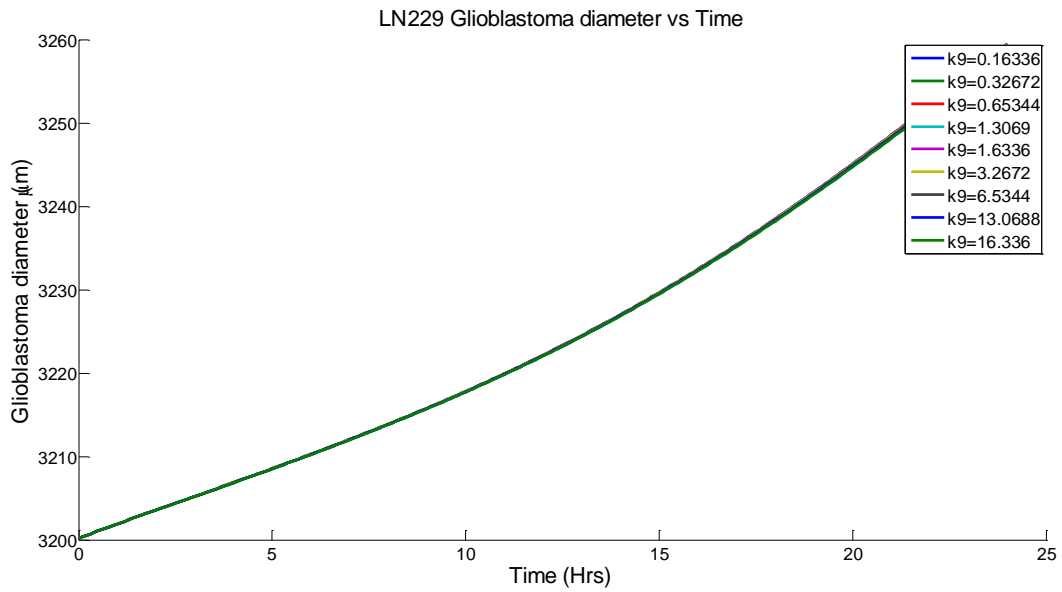

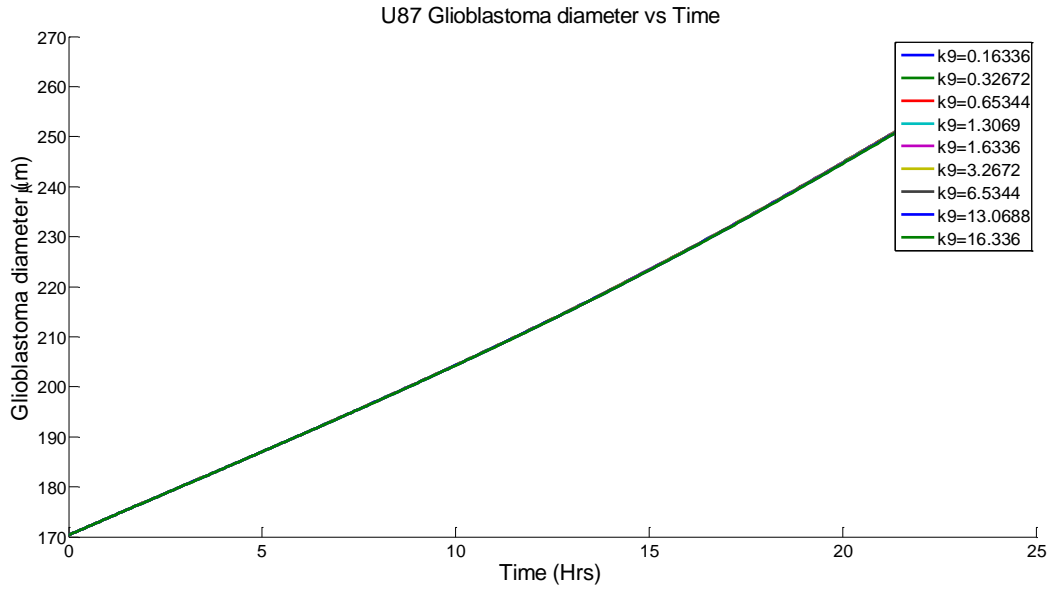

**k10**

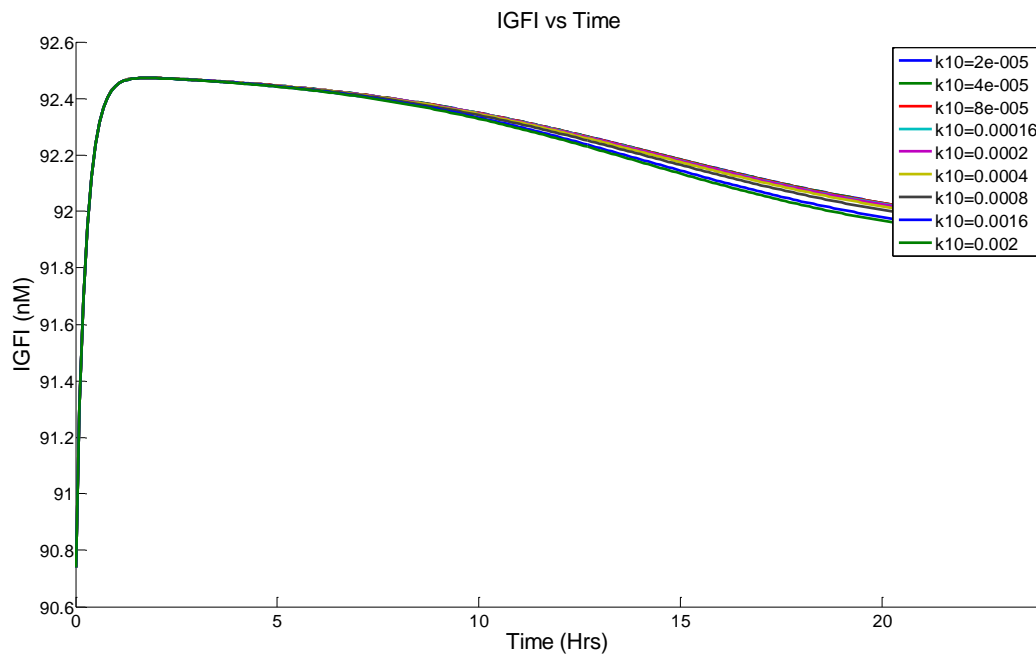

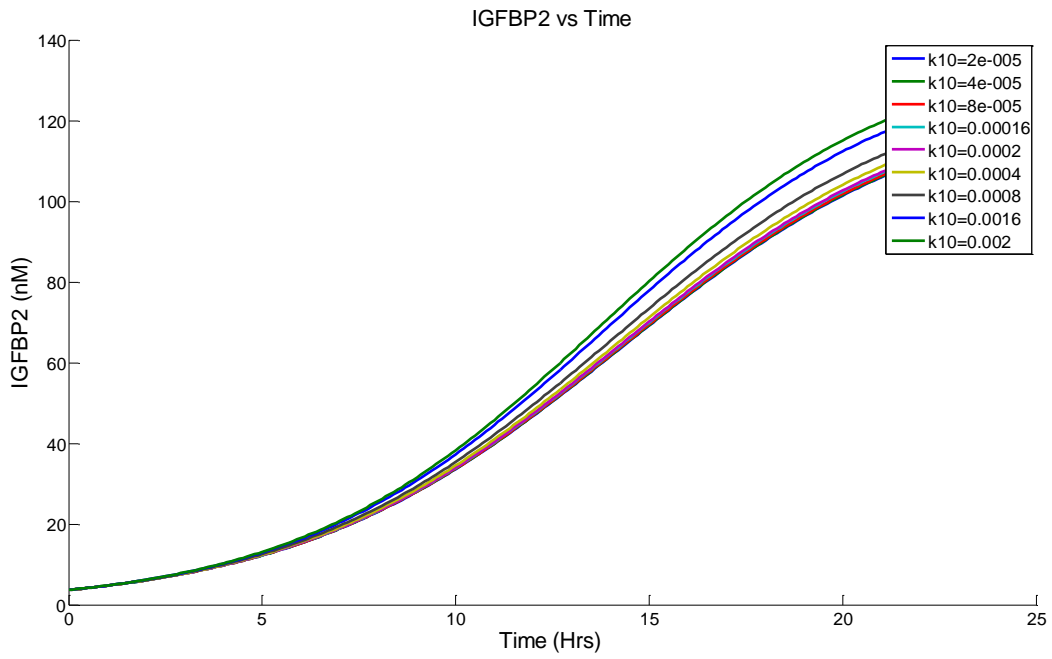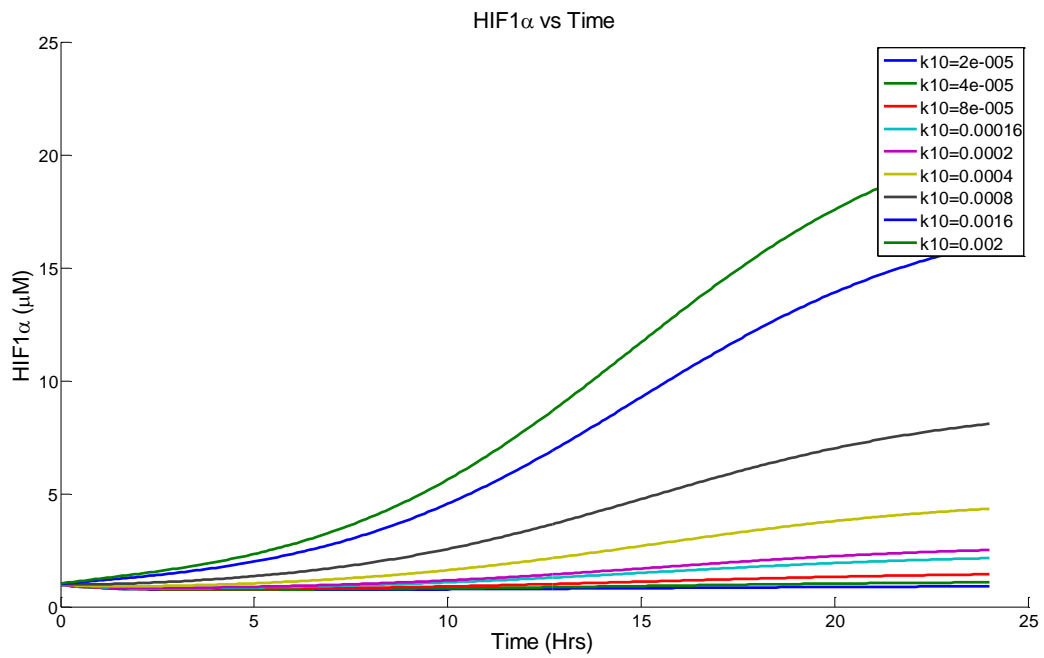

LN229 Glioblastoma diameter vs Time

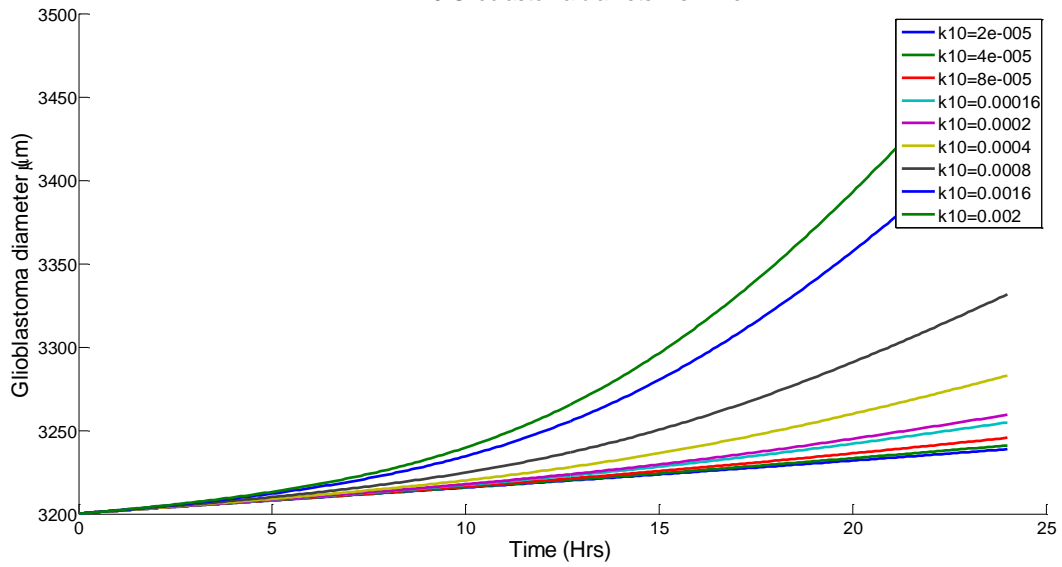

U87 Glioblastoma diameter vs Time

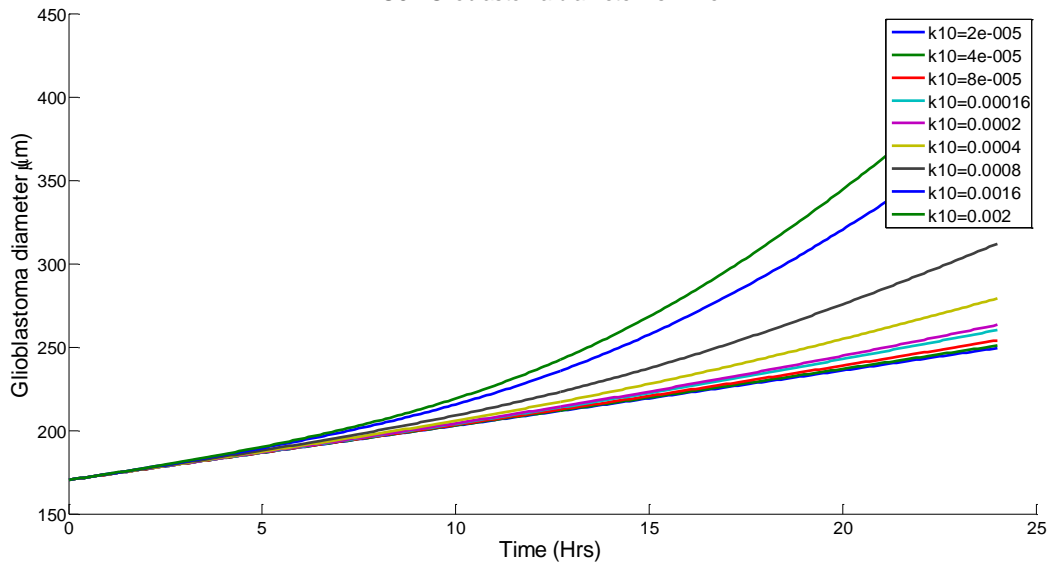



v1

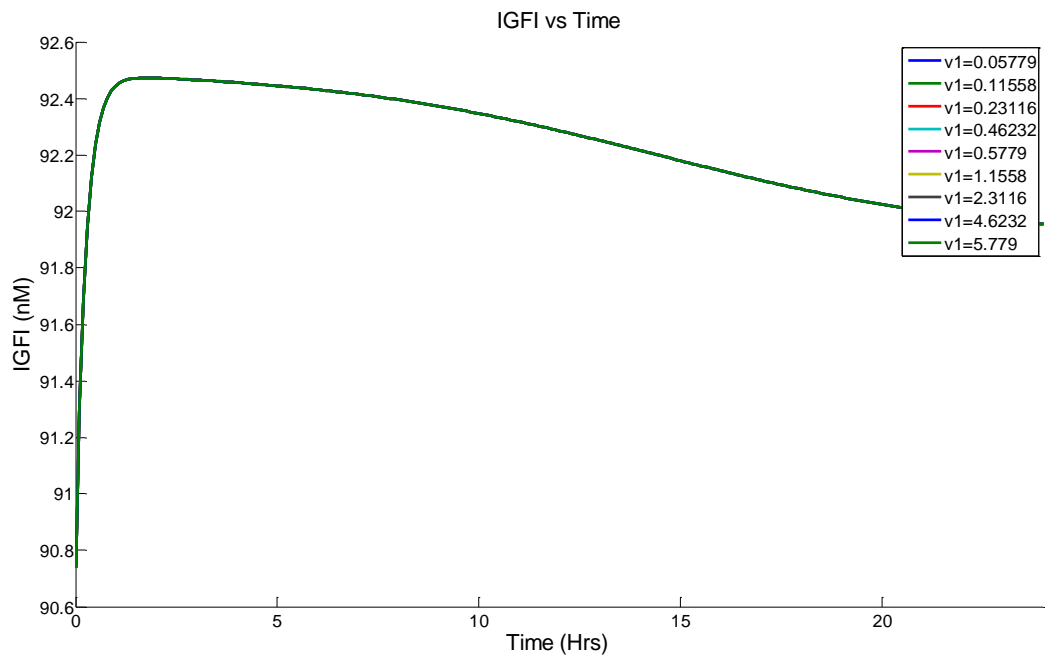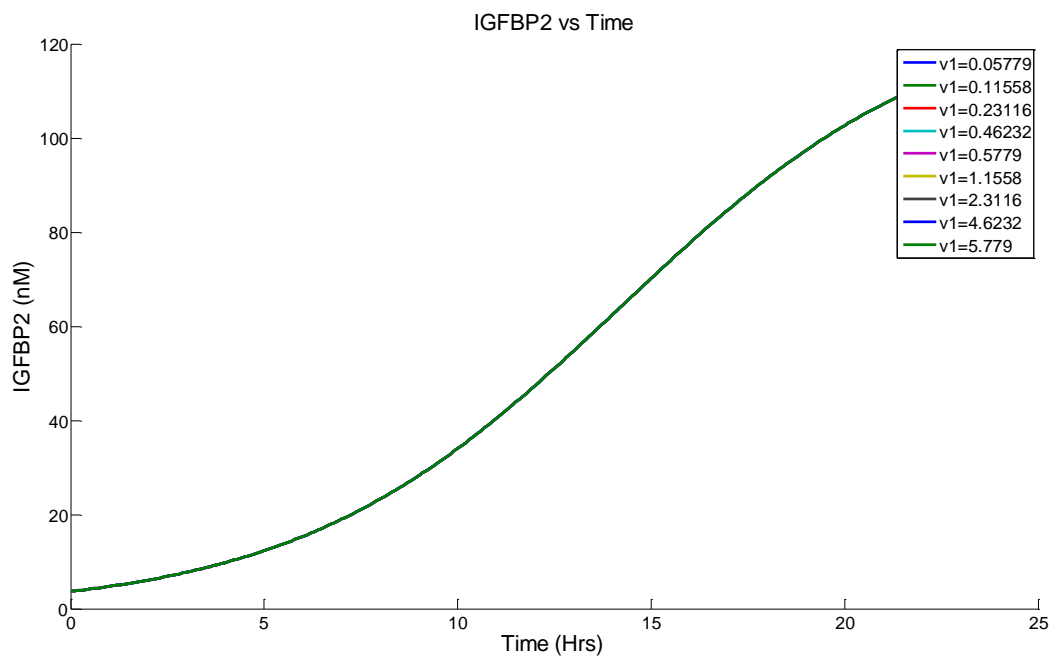





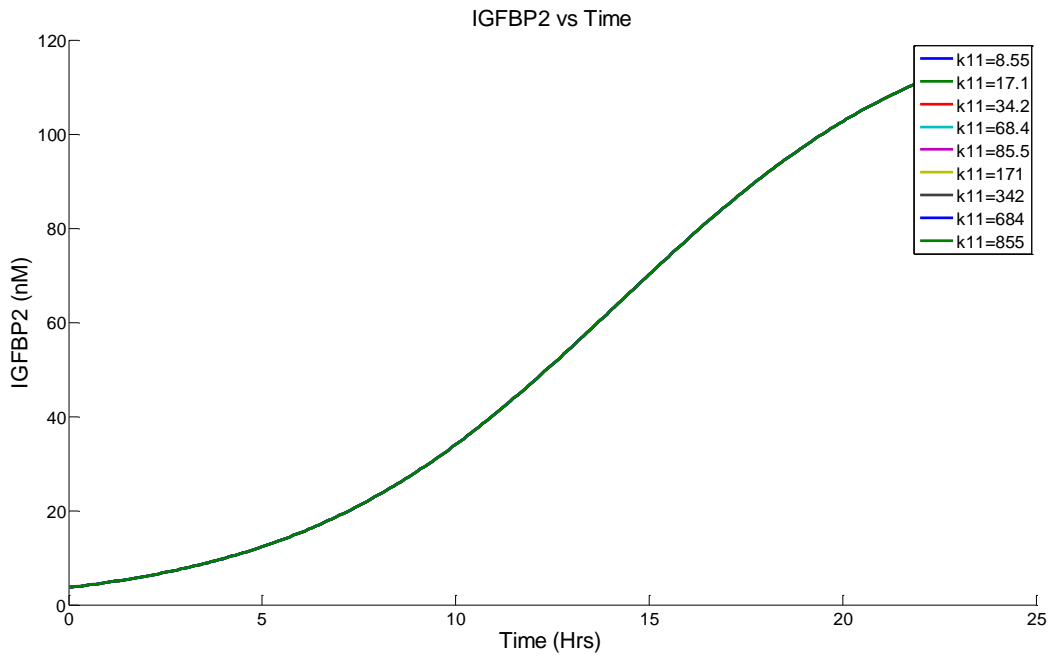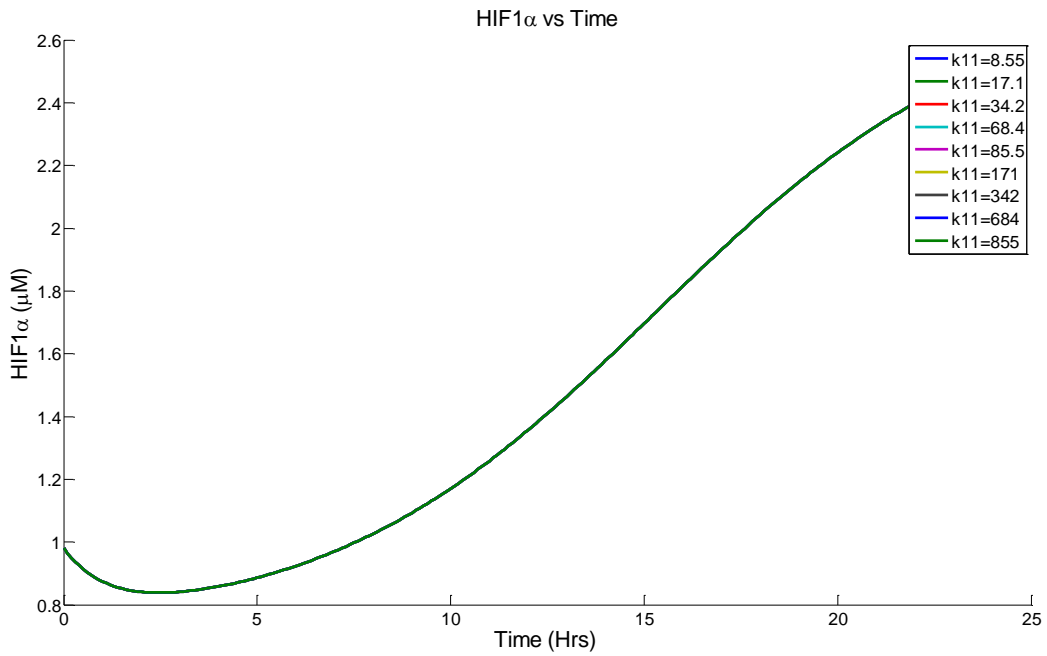

LN229 Glioblastoma diameter vs Time

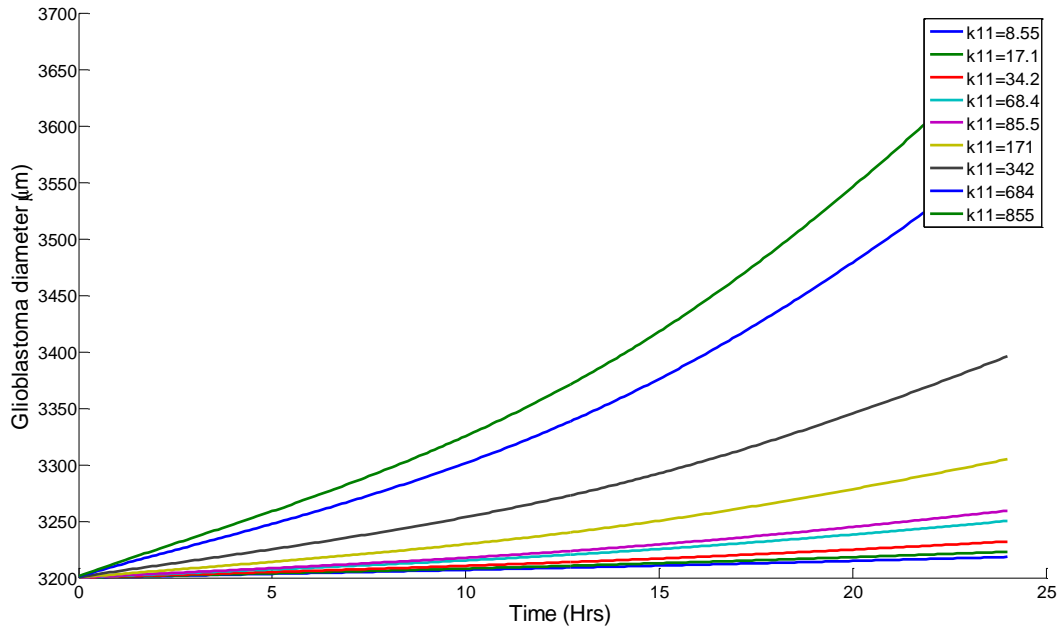

U87 Glioblastoma diameter vs Time

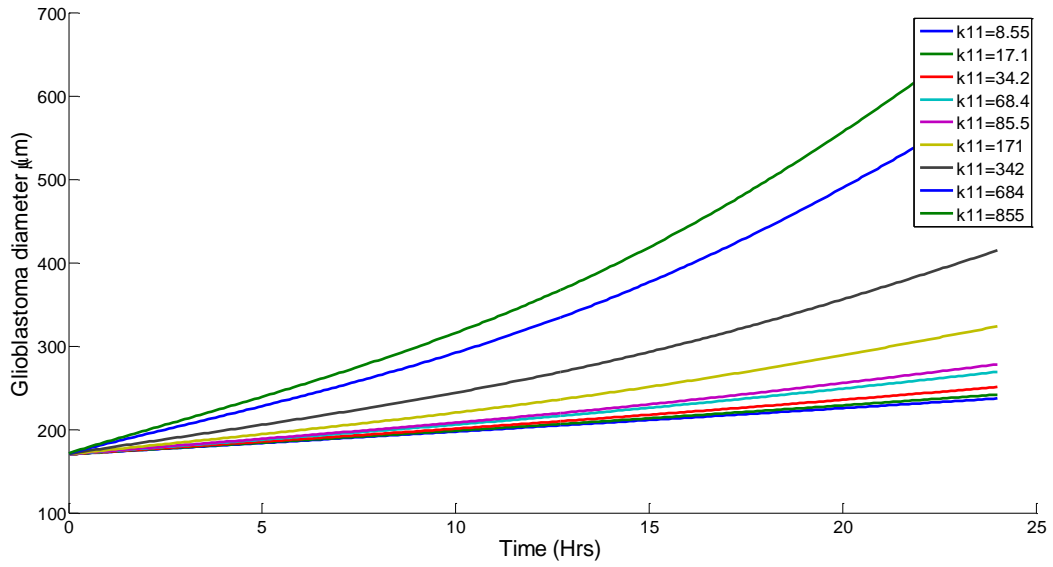

Supplement: pcbi.1004169.s002.pdf [file pcbi.1004169.s002.pdf]
