# Supplementary material for: Simulation Predicts IGFBP2-HIF1α Interaction Drives Glioblastoma Growth
Source: PubMed Central journal article supplement (PMC4401766; doi:10.1371/journal.pcbi.1004169), 2015-04-17
Supplement: pcbi.1004169.s004.pdf [file pcbi.1004169.s004.pdf]

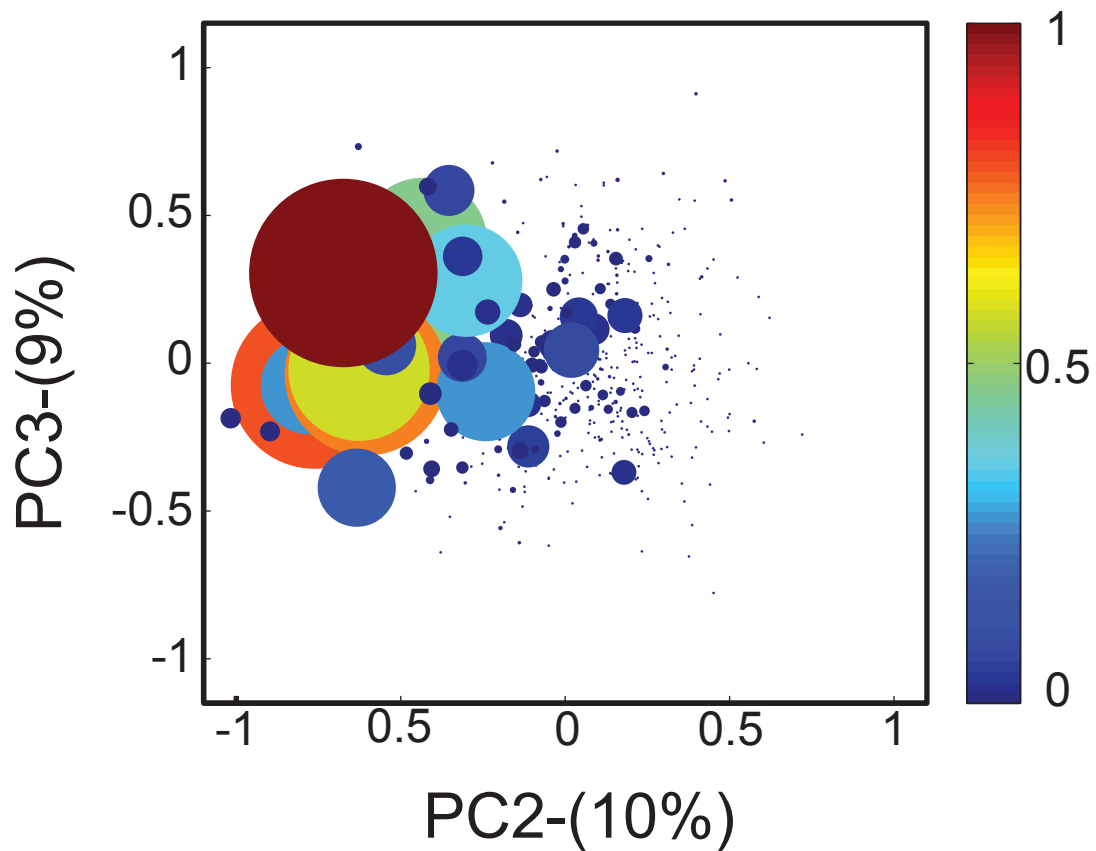

**S2 Figure. Results from Principle Component Analysis of the rate constants and its effect on the glioblastoma growth in the U87 glioblastoma cell line.** PC2 is the second principle component and PC3 is the third principle component. Both components contributed about 10% and 9% each to the overall correlation respectively.
