# Supplementary material for: Simulation Predicts IGFBP2-HIF1α Interaction Drives Glioblastoma Growth
Source: PubMed Central journal article supplement (PMC4401766; doi:10.1371/journal.pcbi.1004169), 2015-04-17
Supplement: pcbi.1004169.s005.pdf [file pcbi.1004169.s005.pdf]

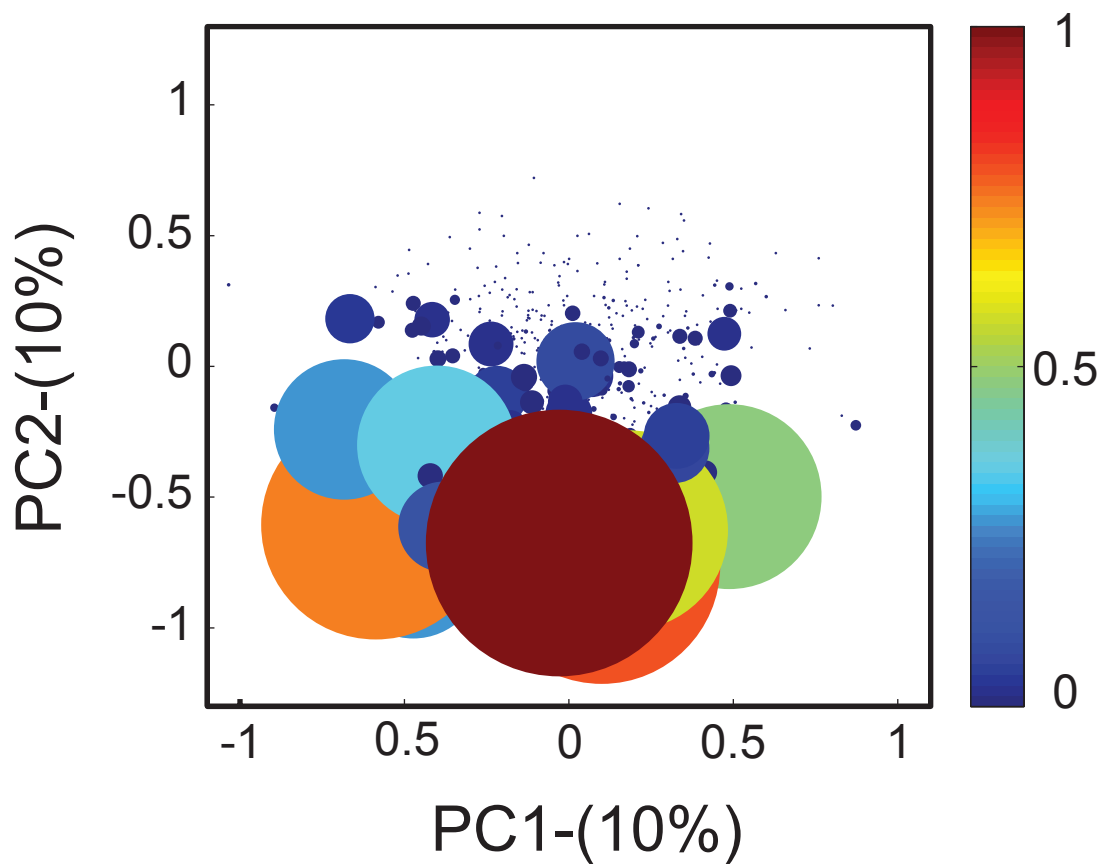

**S3 Figure. Results from Principle Component Analysis of the rate constants and its effect on the glioblastoma growth in the LN229 glioblastoma cell line.** PC1 is the first principle component and PC2 is the second principle component. Both components contributed about 10% each to the overall correlation.
