# Supplementary material for: Simulation Predicts IGFBP2-HIF1α Interaction Drives Glioblastoma Growth
Source: PubMed Central journal article supplement (PMC4401766; doi:10.1371/journal.pcbi.1004169), 2015-04-17
Supplement: pcbi.1004169.s007.pdf [file pcbi.1004169.s007.pdf]

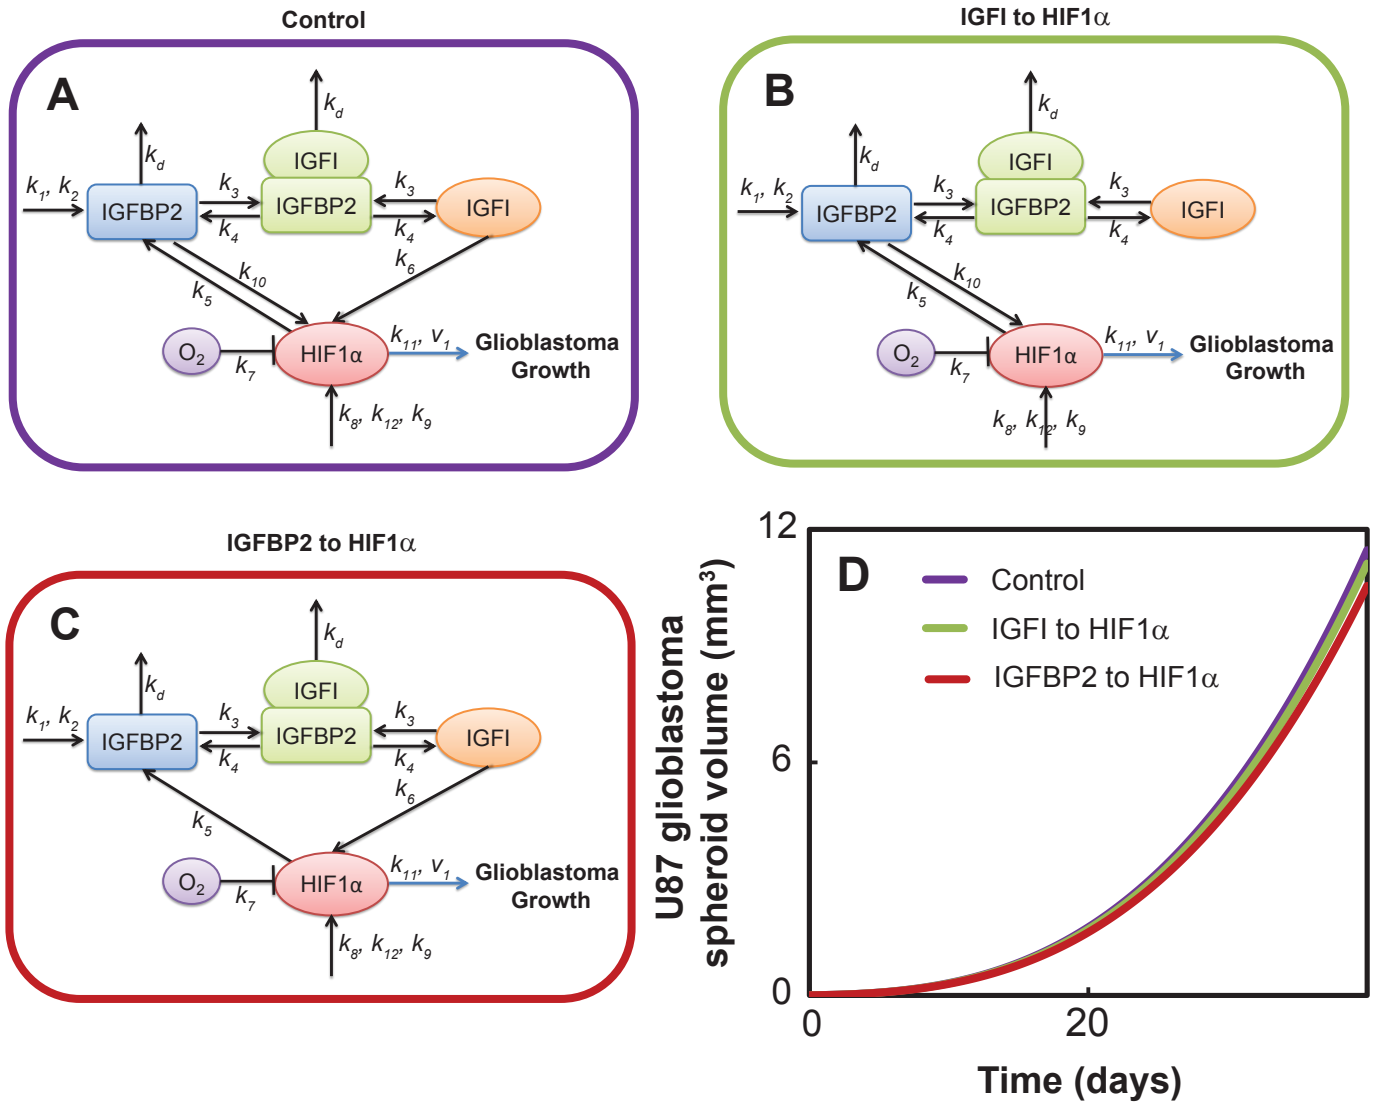

**S5 Figure.** *in silico* reduction of glioblastoma growth for U87 glioblastoma cell line. Glioblastoma growth was simulated for (A) control conditions, and when two separate interactions were removed from the model: (B) IGFI to HIF1 $\alpha$  and (C) IGFBP2 to HIF1 $\alpha$ . (D) Removal of the IGFBP2 to HIF1 $\alpha$  had a small reduction in the glioblastoma growth as compared to control conditions.
